# Supplementary material
Source: PubMed Central journal article supplement (PMC5980710)
Supplement: NIHMS939814-supplement-Supplementary_Information.pdf [file NIHMS939814-supplement-Supplementary_Information.pdf]

Supporting information for:  
Flex ddG: Rosetta Ensemble-Based  
Estimation of Changes in Protein-Protein  
Binding Affinity Upon Mutation

Kyle A. Barlow,<sup>†</sup> Shane O Conchúir,<sup>‡,¶</sup> Samuel Thompson,<sup>§</sup> Pooja Suresh,<sup>§</sup> James  
E. Lucas,<sup>||</sup> Markus Heinonen,<sup>⊥, #</sup> and Tanja Kortemme<sup>\*, ‡, ¶, †, §, ||, @</sup>

<sup>†</sup>*Graduate Program in Bioinformatics, University of California San Francisco, San  
Francisco, California, United States of America*

<sup>‡</sup>*California Institute for Quantitative Biosciences, University of California San Francisco,  
San Francisco, California, United States of America*

<sup>¶</sup>*Department of Bioengineering and Therapeutic Sciences, University of California San  
Francisco, San Francisco, California, United States of America*

<sup>§</sup>*Graduate Program in Biophysics, University of California San Francisco, San Francisco,  
California, United States of America*

<sup>||</sup>*Graduate Program in Bioengineering, University of California San Francisco, San  
Francisco, California, United States of America*

<sup>⊥</sup>*Aalto University, Department of Computer Science, Espoo, Finland*

<sup>#</sup>*Helsinki Institute for Information Technology HIIT, Helsinki, Finland*

<sup>@</sup>*Chan Zuckerberg Biohub, San Francisco, CA 94158*

E-mail: kortemme@cgl.ucsf.edu

**Table S1: SHA1 Git version of Rosetta used for benchmarking**

| Git SHA1     | Protocol           |
|--------------|--------------------|
| 69aa5266f0d5 | flex ddG           |
| 69aa5266f0d5 | no backrub control |
| 3b2aa5cc3798 | ddG monomer        |

**Table S2: Flex ddG performance comparison, when backrub is run with a sampling temperature (kT) of 1.2 or 1.6 and 10,000 backrub steps (this differs from Table 2, which is shown at 35,000 backrub steps). N = number of cases in the dataset or subset. R = Pearson’s R. MAE = Mean Absolute Error. FC = Fraction Correct. Best performance for each metric and dataset is shown in bold.**

| Mutation Category                   | Prediction Method | N    | R           | MAE         | FC          |
|-------------------------------------|-------------------|------|-------------|-------------|-------------|
| Complete dataset                    | flex ddG          | 1240 | 0.63        | 0.98        | <b>0.76</b> |
|                                     | flex ddG (1.6 kT) |      | <b>0.64</b> | <b>0.93</b> | 0.75        |
| Small-to-large mutation(s)          | flex ddG          | 130  | 0.62        | 0.84        | <b>0.72</b> |
|                                     | flex ddG (1.6 kT) |      | <b>0.64</b> | <b>0.81</b> | <b>0.72</b> |
| Single mutation to alanine          | flex ddG          | 748  | 0.50        | 0.76        | <b>0.75</b> |
|                                     | flex ddG (1.6 kT) |      | <b>0.51</b> | <b>0.72</b> | <b>0.75</b> |
| Multiple mutations                  | flex ddG          | 273  | <b>0.63</b> | 1.63        | <b>0.79</b> |
|                                     | flex ddG (1.6 kT) |      | <b>0.63</b> | <b>1.52</b> | 0.75        |
| Multiple mutations, none to alanine | flex ddG          | 45   | <b>0.65</b> | 1.40        | <b>0.67</b> |
|                                     | flex ddG (1.6 kT) |      | 0.62        | <b>1.38</b> | 0.58        |

| Mutation Category | Prediction Method  | N   | R           | MAE         | FC          |
|-------------------|--------------------|-----|-------------|-------------|-------------|
| pdb-1A22          | flex ddG           | 142 | <b>0.32</b> | <b>0.61</b> | <b>0.79</b> |
|                   | no backrub control |     | 0.18        | 0.77        | 0.74        |
|                   | ddG monomer        |     | 0.12        | 0.91        | 0.73        |
|                   | ZEMu paper         |     | 0.19        | 0.68        | 0.78        |
| pdb-1A4Y          | flex ddG           | 45  | 0.81        | 1.34        | 0.71        |
|                   | no backrub control |     | 0.79        | 1.47        | <b>0.78</b> |
|                   | ddG monomer        |     | 0.77        | 1.91        | 0.62        |
|                   | ZEMu paper         |     | <b>0.87</b> | <b>1.12</b> | 0.73        |
| pdb-1ACB          | flex ddG           | 6   | 0.28        | 2.89        | 0.83        |
|                   | no backrub control |     | 0.23        | 2.37        | 0.83        |
|                   | ddG monomer        |     | 0.58        | <b>1.57</b> | <b>1.00</b> |
|                   | ZEMu paper         |     | <b>0.79</b> | 2.17        | 0.83        |
| pdb-1AHW          | flex ddG           | 10  | -0.83       | 1.31        | 0.4         |
|                   | no backrub control |     | -0.42       | 1.42        | 0.4         |
|                   | ddG monomer        |     | -0.34       | 1.26        | 0.5         |
|                   | ZEMu paper         |     | <b>0.30</b> | <b>0.93</b> | <b>0.6</b>  |
| pdb-1AK4          | flex ddG           | 15  | <b>0.73</b> | <b>0.53</b> | <b>0.73</b> |
|                   | no backrub control |     | 0.35        | 1.01        | 0.47        |
|                   | ddG monomer        |     | 0.63        | 1.35        | 0.60        |
|                   | ZEMu paper         |     | 0.44        | 1.63        | 0.53        |
| pdb-1CBW          | flex ddG           | 15  | 0.01        | <b>0.59</b> | <b>0.87</b> |
|                   | no backrub control |     | <b>0.05</b> | 0.83        | 0.67        |
|                   | ddG monomer        |     | -0.09       | 0.72        | 0.67        |
|                   | ZEMu paper         |     | -0.26       | 0.71        | 0.67        |
| pdb-1CSE          | flex ddG           | 6   | 0.44        | 1.94        | 0.67        |
|                   | no backrub control |     | 0.37        | 2.03        | 0.67        |
|                   | ddG monomer        |     | 0.46        | 1.88        | 0.67        |

|          |                    |     |             |             |             |
|----------|--------------------|-----|-------------|-------------|-------------|
|          | ZEMu paper         |     | <b>0.87</b> | <b>0.81</b> | <b>1.00</b> |
| pdb-1DAN | flex ddG           |     | 0.65        | <b>0.53</b> | <b>0.88</b> |
|          | no backrub control | 118 | <b>0.69</b> | 0.59        | 0.85        |
|          | ddG monomer        |     | 0.61        | 0.71        | 0.83        |
|          | ZEMu paper         |     | 0.32        | 0.88        | 0.76        |
| pdb-1DFJ | flex ddG           |     | 0.70        | 1.35        | <b>0.70</b> |
|          | no backrub control | 20  | <b>0.83</b> | <b>1.04</b> | 0.60        |
|          | ddG monomer        |     | 0.69        | 1.38        | 0.55        |
|          | ZEMu paper         |     | 0.55        | 1.40        | 0.55        |
| pdb-1DQJ | flex ddG           |     | <b>0.44</b> | <b>1.67</b> | 0.79        |
|          | no backrub control | 34  | 0.39        | 1.93        | 0.65        |
|          | ddG monomer        |     | 0.37        | 1.87        | <b>0.82</b> |
|          | ZEMu paper         |     | 0.28        | 2.08        | 0.59        |
| pdb-1DVF | flex ddG           |     | 0.63        | 1.58        | 0.53        |
|          | no backrub control | 38  | <b>0.65</b> | <b>1.50</b> | 0.66        |
|          | ddG monomer        |     | 0.61        | 1.54        | <b>0.71</b> |
|          | ZEMu paper         |     | 0.57        | 1.54        | 0.53        |
| pdb-1E96 | flex ddG           |     | <b>0.52</b> | <b>0.84</b> | 0.50        |
|          | no backrub control | 6   | 0.51        | 0.91        | 0.50        |
|          | ddG monomer        |     | 0.45        | 0.96        | 0.50        |
|          | ZEMu paper         |     | 0.50        | 0.85        | <b>0.67</b> |
| pdb-1EAW | flex ddG           |     | 0.03        | 0.58        | 0.85        |
|          | no backrub control | 27  | 0.07        | 0.73        | 0.81        |
|          | ddG monomer        |     | <b>0.13</b> | 0.61        | 0.89        |
|          | ZEMu paper         |     | 0.00        | <b>0.49</b> | <b>0.93</b> |
| pdb-1EMV | flex ddG           |     | <b>0.89</b> | <b>0.86</b> | <b>0.86</b> |
|          | no backrub control | 51  | 0.84        | 0.98        | 0.84        |
|          | ddG monomer        |     | 0.84        | 0.96        | 0.80        |

|          |                    |    |             |             |             |
|----------|--------------------|----|-------------|-------------|-------------|
|          | ZEMu paper         |    | 0.87        | 0.89        | 0.84        |
| pdb-1F47 | flex ddG           |    | 0.56        | <b>0.72</b> | 0.50        |
|          | no backrub control | 12 | 0.58        | 0.87        | <b>0.58</b> |
|          | ddG monomer        |    | <b>0.60</b> | 0.87        | <b>0.58</b> |
|          | ZEMu paper         |    | 0.51        | 1.02        | 0.42        |
| pdb-1FC2 | flex ddG           |    | -0.07       | <b>0.84</b> | 0.56        |
|          | no backrub control | 9  | -0.09       | 1.01        | 0.67        |
|          | ddG monomer        |    | -0.39       | 1.19        | 0.44        |
|          | ZEMu paper         |    | <b>0.28</b> | 0.89        | <b>0.78</b> |
| pdb-1FCC | flex ddG           |    | -0.21       | 1.56        | <b>0.5</b>  |
|          | no backrub control | 8  | -0.22       | 1.96        | <b>0.5</b>  |
|          | ddG monomer        |    | -0.06       | 1.50        | <b>0.5</b>  |
|          | ZEMu paper         |    | <b>0.16</b> | <b>1.35</b> | <b>0.5</b>  |
| pdb-1GC1 | flex ddG           |    | 0.12        | <b>0.35</b> | <b>0.91</b> |
|          | no backrub control | 56 | -0.15       | 0.43        | 0.86        |
|          | ddG monomer        |    | 0.28        | 0.38        | 0.86        |
|          | ZEMu paper         |    | <b>0.36</b> | 0.55        | 0.84        |
| pdb-1HE8 | flex ddG           |    | 0.39        | 0.67        | <b>0.5</b>  |
|          | no backrub control | 10 | 0.62        | 0.91        | <b>0.5</b>  |
|          | ddG monomer        |    | 0.26        | <b>0.66</b> | 0.3         |
|          | ZEMu paper         |    | <b>0.81</b> | 1.23        | <b>0.5</b>  |
| pdb-1IAR | flex ddG           |    | 0.64        | <b>0.72</b> | 0.78        |
|          | no backrub control | 36 | 0.35        | 1.32        | 0.67        |
|          | ddG monomer        |    | <b>0.66</b> | 0.98        | <b>0.81</b> |
|          | ZEMu paper         |    | 0.45        | 0.86        | 0.78        |
| pdb-1JCK | flex ddG           |    | 0.46        | 1.22        | 0.57        |
|          | no backrub control | 7  | 0.44        | 0.97        | <b>0.71</b> |
|          | ddG monomer        |    | 0.75        | 1.25        | <b>0.71</b> |

|          |                    |     |             |             |             |
|----------|--------------------|-----|-------------|-------------|-------------|
|          | ZEMu paper         |     | <b>0.85</b> | <b>0.94</b> | <b>0.71</b> |
| pdb-1JRH | flex ddG           |     | <b>0.58</b> | <b>1.09</b> | 0.66        |
|          | no backrub control | 53  | 0.50        | 1.25        | 0.60        |
|          | ddG monomer        |     | 0.52        | 1.29        | <b>0.75</b> |
|          | ZEMu paper         |     | 0.57        | 1.15        | 0.58        |
| pdb-1JTG | flex ddG           |     | 0.44        | 1.87        | 0.84        |
|          | no backrub control | 118 | 0.39        | <b>1.77</b> | 0.83        |
|          | ddG monomer        |     | 0.40        | 2.12        | <b>0.86</b> |
|          | ZEMu paper         |     | <b>0.51</b> | <b>1.77</b> | 0.75        |
| pdb-1KTZ | flex ddG           |     | <b>0.86</b> | <b>0.63</b> | 0.74        |
|          | no backrub control | 27  | 0.76        | 1.16        | <b>0.85</b> |
|          | ddG monomer        |     | 0.71        | 1.13        | 0.81        |
|          | ZEMu paper         |     | 0.80        | 0.83        | 0.70        |
| pdb-1LFD | flex ddG           |     | <b>0.55</b> | <b>0.68</b> | <b>0.72</b> |
|          | no backrub control | 25  | 0.13        | 1.21        | 0.60        |
|          | ddG monomer        |     | 0.28        | 0.97        | <b>0.72</b> |
|          | ZEMu paper         |     | 0.27        | 0.84        | 0.60        |
| pdb-1MLC | flex ddG           |     | -0.28       | 1.01        | 0.62        |
|          | no backrub control | 16  | 0.22        | 0.82        | 0.75        |
|          | ddG monomer        |     | 0.28        | 0.83        | 0.56        |
|          | ZEMu paper         |     | <b>0.79</b> | <b>0.42</b> | <b>0.88</b> |
| pdb-1NMB | flex ddG           |     | 0.21        | 0.83        | <b>0.83</b> |
|          | no backrub control | 6   | 0.48        | 0.83        | 0.67        |
|          | ddG monomer        |     | 0.62        | <b>0.60</b> | <b>0.83</b> |
|          | ZEMu paper         |     | <b>0.78</b> | 1.97        | 0.17        |
| pdb-1REW | flex ddG           |     | <b>0.89</b> | <b>0.67</b> | <b>0.92</b> |
|          | no backrub control | 24  | 0.78        | 1.19        | 0.75        |
|          | ddG monomer        |     | 0.76        | 1.20        | 0.79        |

|          |                    |    |             |             |             |
|----------|--------------------|----|-------------|-------------|-------------|
|          | ZEMu paper         |    | 0.65        | 1.03        | <b>0.92</b> |
| pdb-1S1Q | flex ddG           |    | 0.17        | <b>0.68</b> | <b>0.67</b> |
|          | no backrub control | 6  | 0.22        | 0.75        | <b>0.67</b> |
|          | ddG monomer        |    | <b>0.34</b> | 0.71        | <b>0.67</b> |
|          | ZEMu paper         |    | -0.07       | 1.09        | 0.50        |
| pdb-1TM1 | flex ddG           |    | 0.33        | 1.71        | 0.43        |
|          | no backrub control | 21 | 0.23        | 1.81        | 0.43        |
|          | ddG monomer        |    | 0.23        | 1.72        | 0.62        |
|          | ZEMu paper         |    | <b>0.58</b> | <b>1.37</b> | <b>0.71</b> |
| pdb-1UUZ | flex ddG           |    | 0.79        | 0.62        | <b>0.8</b>  |
|          | no backrub control | 5  | <b>0.92</b> | <b>0.52</b> | <b>0.8</b>  |
|          | ddG monomer        |    | 0.83        | 0.80        | <b>0.8</b>  |
|          | ZEMu paper         |    | 0.42        | 1.60        | 0.2         |
| pdb-1VFB | flex ddG           |    | 0.58        | <b>0.95</b> | <b>0.70</b> |
|          | no backrub control | 43 | 0.21        | 1.50        | 0.67        |
|          | ddG monomer        |    | <b>0.64</b> | 1.40        | <b>0.70</b> |
|          | ZEMu paper         |    | 0.60        | 1.07        | 0.65        |
| pdb-1XD3 | flex ddG           |    | 0.46        | 0.95        | 0.72        |
|          | no backrub control | 18 | 0.28        | 1.43        | 0.67        |
|          | ddG monomer        |    | 0.51        | 1.15        | 0.67        |
|          | ZEMu paper         |    | <b>0.56</b> | <b>0.71</b> | <b>0.83</b> |
| pdb-2I9B | flex ddG           |    | -0.81       | 0.53        | <b>1.0</b>  |
|          | no backrub control | 5  | -0.00       | <b>0.49</b> | <b>1.0</b>  |
|          | ddG monomer        |    | -0.56       | 0.55        | <b>1.0</b>  |
|          | ZEMu paper         |    | <b>0.65</b> | 0.62        | <b>1.0</b>  |
| pdb-2JEL | flex ddG           |    | <b>0.67</b> | 0.64        | <b>0.84</b> |
|          | no backrub control | 43 | 0.62        | <b>0.63</b> | 0.81        |
|          | ddG monomer        |    | 0.64        | 0.70        | <b>0.84</b> |

|          |                    |    |             |             |             |
|----------|--------------------|----|-------------|-------------|-------------|
|          | ZEMu paper         |    | 0.48        | 0.81        | 0.74        |
| pdb-2PCB | flex ddG           |    | <b>0.28</b> | <b>0.44</b> | <b>1.00</b> |
|          | no backrub control | 6  | 0.23        | 0.64        | 0.67        |
|          | ddG monomer        |    | -0.70       | 0.90        | <b>1.00</b> |
|          | ZEMu paper         |    | -0.63       | 0.95        | 0.83        |
| pdb-2PCC | flex ddG           |    | <b>0.10</b> | <b>1.27</b> | <b>0.5</b>  |
|          | no backrub control | 12 | 0.04        | 1.49        | <b>0.5</b>  |
|          | ddG monomer        |    | -0.29       | 1.90        | <b>0.5</b>  |
|          | ZEMu paper         |    | -0.24       | 1.53        | <b>0.5</b>  |
| pdb-2VLJ | flex ddG           |    | 0.40        | <b>0.84</b> | 0.57        |
|          | no backrub control | 14 | <b>0.42</b> | 1.75        | 0.43        |
|          | ddG monomer        |    | 0.26        | 0.93        | 0.50        |
|          | ZEMu paper         |    | 0.15        | 0.89        | <b>0.64</b> |
| pdb-2WPT | flex ddG           |    | 0.54        | 1.60        | 0.62        |
|          | no backrub control | 32 | <b>0.63</b> | <b>1.39</b> | <b>0.75</b> |
|          | ddG monomer        |    | 0.56        | 1.63        | 0.69        |
|          | ZEMu paper         |    | 0.45        | 1.63        | 0.56        |
| pdb-3BK3 | flex ddG           |    | <b>0.72</b> | <b>0.51</b> | 0.69        |
|          | no backrub control | 13 | 0.70        | 0.98        | 0.62        |
|          | ddG monomer        |    | 0.65        | 0.55        | <b>0.85</b> |
|          | ZEMu paper         |    | 0.31        | 1.45        | 0.54        |
| pdb-3BN9 | flex ddG           |    | 0.48        | <b>0.39</b> | <b>0.88</b> |
|          | no backrub control | 25 | <b>0.53</b> | 0.40        | <b>0.88</b> |
|          | ddG monomer        |    | 0.31        | 0.66        | <b>0.88</b> |
|          | ZEMu paper         |    | -0.09       | 0.66        | 0.84        |
| pdb-3NPS | flex ddG           |    | 0.18        | <b>0.71</b> | 0.74        |
|          | no backrub control | 27 | <b>0.26</b> | 0.87        | <b>0.78</b> |
|          | ddG monomer        |    | 0.15        | 0.84        | <b>0.78</b> |
|          | ZEMu paper         |    | -0.21       | 0.89        | 0.67        |



---

**Table S3: Flex ddG performance by PDB structure for all complexes with 5 or more cases. Backrub steps = 35000. N = number of cases (variants) for each complex. R = Pearson's R. MAE = Mean Absolute Error. FC = Fraction Correct. Best performance for each metric and dataset is shown in bold.**

**Table S4: Selection of key data shown in Fig. 3**

| Run                | Subset                              | Models | R    | MAE  |
|--------------------|-------------------------------------|--------|------|------|
| flex ddG           | Complete dataset                    | 1      | 0.54 | 1.23 |
| flex ddG           | Complete dataset                    | 20     | 0.63 | 0.99 |
| flex ddG           | Complete dataset                    | 30     | 0.63 | 0.98 |
| flex ddG           | Complete dataset                    | 40     | 0.63 | 0.97 |
| flex ddG           | Complete dataset                    | 50     | 0.63 | 0.96 |
| no backrub control | Complete dataset                    | 1      | 0.57 | 1.14 |
| no backrub control | Complete dataset                    | 20     | 0.57 | 1.12 |
| no backrub control | Complete dataset                    | 30     | 0.57 | 1.12 |
| no backrub control | Complete dataset                    | 40     | 0.56 | 1.12 |
| no backrub control | Complete dataset                    | 50     | 0.56 | 1.12 |
| flex ddG           | Small-to-large mutation(s)          | 1      | 0.40 | 1.11 |
| flex ddG           | Small-to-large mutation(s)          | 20     | 0.64 | 0.82 |
| flex ddG           | Small-to-large mutation(s)          | 30     | 0.64 | 0.80 |
| flex ddG           | Small-to-large mutation(s)          | 40     | 0.65 | 0.79 |
| flex ddG           | Small-to-large mutation(s)          | 50     | 0.65 | 0.78 |
| no backrub control | Small-to-large mutation(s)          | 1      | 0.39 | 1.12 |
| no backrub control | Small-to-large mutation(s)          | 20     | 0.40 | 1.12 |
| no backrub control | Small-to-large mutation(s)          | 30     | 0.41 | 1.12 |
| no backrub control | Small-to-large mutation(s)          | 40     | 0.41 | 1.11 |
| no backrub control | Small-to-large mutation(s)          | 50     | 0.41 | 1.11 |
| flex ddG           | Multiple mutations, none to alanine | 1      | 0.33 | 1.88 |
| flex ddG           | Multiple mutations, none to alanine | 20     | 0.66 | 1.46 |
| flex ddG           | Multiple mutations, none to alanine | 30     | 0.62 | 1.44 |
| flex ddG           | Multiple mutations, none to alanine | 40     | 0.62 | 1.42 |
| flex ddG           | Multiple mutations, none to alanine | 50     | 0.63 | 1.38 |
| no backrub control | Multiple mutations, none to alanine | 1      | 0.45 | 1.64 |
| no backrub control | Multiple mutations, none to alanine | 20     | 0.45 | 1.63 |
| no backrub control | Multiple mutations, none to alanine | 30     | 0.45 | 1.63 |
| no backrub control | Multiple mutations, none to alanine | 40     | 0.44 | 1.64 |
| no backrub control | Multiple mutations, none to alanine | 50     | 0.44 | 1.66 |
| flex ddG           | Single mutation to alanine          | 1      | 0.42 | 0.99 |
| flex ddG           | Single mutation to alanine          | 20     | 0.50 | 0.76 |
| flex ddG           | Single mutation to alanine          | 30     | 0.50 | 0.76 |
| flex ddG           | Single mutation to alanine          | 40     | 0.51 | 0.75 |
| flex ddG           | Single mutation to alanine          | 50     | 0.51 | 0.75 |
| no backrub control | Single mutation to alanine          | 1      | 0.44 | 0.91 |
| no backrub control | Single mutation to alanine          | 20     | 0.44 | 0.90 |
| no backrub control | Single mutation to alanine          | 30     | 0.44 | 0.90 |
| no backrub control | Single mutation to alanine          | 40     | 0.44 | 0.90 |
| no backrub control | Single mutation to alanine          | 50     | 0.44 | 0.90 |

**Table S5: Selection of key data shown in Fig. S2**

| Run                | Subset                              | Models | R    | MAE  |
|--------------------|-------------------------------------|--------|------|------|
| ddG monomer        | Complete dataset                    | 1      | 0.41 | 1.87 |
| ddG monomer        | Complete dataset                    | 20     | 0.59 | 1.25 |
| ddG monomer        | Complete dataset                    | 30     | 0.60 | 1.22 |
| ddG monomer        | Complete dataset                    | 40     | 0.61 | 1.19 |
| ddG monomer        | Complete dataset                    | 50     | 0.62 | 1.16 |
| no backrub control | Complete dataset                    | 1      | 0.57 | 1.14 |
| no backrub control | Complete dataset                    | 20     | 0.57 | 1.12 |
| no backrub control | Complete dataset                    | 30     | 0.57 | 1.12 |
| no backrub control | Complete dataset                    | 40     | 0.56 | 1.12 |
| no backrub control | Complete dataset                    | 50     | 0.56 | 1.12 |
| ddG monomer        | Small-to-large mutation(s)          | 1      | 0.18 | 1.95 |
| ddG monomer        | Small-to-large mutation(s)          | 20     | 0.47 | 1.19 |
| ddG monomer        | Small-to-large mutation(s)          | 30     | 0.50 | 1.14 |
| ddG monomer        | Small-to-large mutation(s)          | 40     | 0.50 | 1.11 |
| ddG monomer        | Small-to-large mutation(s)          | 50     | 0.52 | 1.05 |
| no backrub control | Small-to-large mutation(s)          | 1      | 0.39 | 1.12 |
| no backrub control | Small-to-large mutation(s)          | 20     | 0.40 | 1.12 |
| no backrub control | Small-to-large mutation(s)          | 30     | 0.41 | 1.12 |
| no backrub control | Small-to-large mutation(s)          | 40     | 0.41 | 1.11 |
| no backrub control | Small-to-large mutation(s)          | 50     | 0.41 | 1.11 |
| ddG monomer        | Multiple mutations, none to alanine | 1      | 0.35 | 2.96 |
| ddG monomer        | Multiple mutations, none to alanine | 20     | 0.54 | 1.73 |
| ddG monomer        | Multiple mutations, none to alanine | 30     | 0.57 | 1.59 |
| ddG monomer        | Multiple mutations, none to alanine | 40     | 0.56 | 1.58 |
| ddG monomer        | Multiple mutations, none to alanine | 50     | 0.58 | 1.48 |
| no backrub control | Multiple mutations, none to alanine | 1      | 0.45 | 1.64 |
| no backrub control | Multiple mutations, none to alanine | 20     | 0.45 | 1.63 |
| no backrub control | Multiple mutations, none to alanine | 30     | 0.45 | 1.63 |
| no backrub control | Multiple mutations, none to alanine | 40     | 0.44 | 1.64 |
| no backrub control | Multiple mutations, none to alanine | 50     | 0.44 | 1.66 |
| ddG monomer        | Single mutation to alanine          | 1      | 0.24 | 1.22 |
| ddG monomer        | Single mutation to alanine          | 20     | 0.43 | 0.82 |
| ddG monomer        | Single mutation to alanine          | 30     | 0.46 | 0.79 |
| ddG monomer        | Single mutation to alanine          | 40     | 0.47 | 0.76 |
| ddG monomer        | Single mutation to alanine          | 50     | 0.50 | 0.76 |
| no backrub control | Single mutation to alanine          | 1      | 0.44 | 0.91 |
| no backrub control | Single mutation to alanine          | 20     | 0.44 | 0.90 |
| no backrub control | Single mutation to alanine          | 30     | 0.44 | 0.90 |
| no backrub control | Single mutation to alanine          | 40     | 0.44 | 0.90 |
| no backrub control | Single mutation to alanine          | 50     | 0.44 | 0.90 |

**Table S6: Selection of key data shown in Fig. S5**

| Run                | Subset                              | Models | R    | MAE  |
|--------------------|-------------------------------------|--------|------|------|
| flex ddG           | Complete dataset                    | 1      | 0.54 | 1.24 |
| flex ddG           | Complete dataset                    | 20     | 0.63 | 0.98 |
| flex ddG           | Complete dataset                    | 30     | 0.63 | 0.97 |
| flex ddG           | Complete dataset                    | 40     | 0.63 | 0.96 |
| flex ddG           | Complete dataset                    | 50     | 0.63 | 0.96 |
| no backrub control | Complete dataset                    | 1      | 0.56 | 1.12 |
| no backrub control | Complete dataset                    | 20     | 0.57 | 1.12 |
| no backrub control | Complete dataset                    | 30     | 0.56 | 1.12 |
| no backrub control | Complete dataset                    | 40     | 0.56 | 1.12 |
| no backrub control | Complete dataset                    | 50     | 0.56 | 1.12 |
| flex ddG           | Small-to-large mutation(s)          | 1      | 0.57 | 1.09 |
| flex ddG           | Small-to-large mutation(s)          | 20     | 0.65 | 0.79 |
| flex ddG           | Small-to-large mutation(s)          | 30     | 0.66 | 0.76 |
| flex ddG           | Small-to-large mutation(s)          | 40     | 0.66 | 0.77 |
| flex ddG           | Small-to-large mutation(s)          | 50     | 0.65 | 0.78 |
| no backrub control | Small-to-large mutation(s)          | 1      | 0.40 | 1.11 |
| no backrub control | Small-to-large mutation(s)          | 20     | 0.41 | 1.12 |
| no backrub control | Small-to-large mutation(s)          | 30     | 0.41 | 1.11 |
| no backrub control | Small-to-large mutation(s)          | 40     | 0.41 | 1.11 |
| no backrub control | Small-to-large mutation(s)          | 50     | 0.41 | 1.11 |
| flex ddG           | Multiple mutations, none to alanine | 1      | 0.44 | 1.88 |
| flex ddG           | Multiple mutations, none to alanine | 20     | 0.61 | 1.40 |
| flex ddG           | Multiple mutations, none to alanine | 30     | 0.63 | 1.37 |
| flex ddG           | Multiple mutations, none to alanine | 40     | 0.62 | 1.39 |
| flex ddG           | Multiple mutations, none to alanine | 50     | 0.63 | 1.38 |
| no backrub control | Multiple mutations, none to alanine | 1      | 0.45 | 1.66 |
| no backrub control | Multiple mutations, none to alanine | 20     | 0.44 | 1.66 |
| no backrub control | Multiple mutations, none to alanine | 30     | 0.44 | 1.66 |
| no backrub control | Multiple mutations, none to alanine | 40     | 0.44 | 1.66 |
| no backrub control | Multiple mutations, none to alanine | 50     | 0.44 | 1.66 |
| flex ddG           | Single mutation to alanine          | 1      | 0.45 | 0.98 |
| flex ddG           | Single mutation to alanine          | 20     | 0.50 | 0.77 |
| flex ddG           | Single mutation to alanine          | 30     | 0.51 | 0.76 |
| flex ddG           | Single mutation to alanine          | 40     | 0.51 | 0.75 |
| flex ddG           | Single mutation to alanine          | 50     | 0.51 | 0.75 |
| no backrub control | Single mutation to alanine          | 1      | 0.44 | 0.90 |
| no backrub control | Single mutation to alanine          | 20     | 0.44 | 0.90 |
| no backrub control | Single mutation to alanine          | 30     | 0.44 | 0.90 |
| no backrub control | Single mutation to alanine          | 40     | 0.44 | 0.90 |
| no backrub control | Single mutation to alanine          | 50     | 0.44 | 0.90 |

**Table S7: Selection of key data shown in Fig. 4**

| Run                | Subset                              | Backrub Step | R    | MAE  |
|--------------------|-------------------------------------|--------------|------|------|
| no backrub control | Complete dataset                    | 0            | 0.56 | 1.12 |
| flex ddG           | Complete dataset                    | 2500         | 0.64 | 0.99 |
| flex ddG           | Complete dataset                    | 10000        | 0.63 | 0.98 |
| flex ddG           | Complete dataset                    | 20000        | 0.63 | 0.97 |
| flex ddG           | Complete dataset                    | 30000        | 0.63 | 0.96 |
| flex ddG           | Complete dataset                    | 35000        | 0.63 | 0.96 |
| flex ddG           | Complete dataset                    | 40000        | 0.63 | 0.97 |
| flex ddG           | Complete dataset                    | 50000        | 0.63 | 0.96 |
| no backrub control | Small-to-large mutation(s)          | 0            | 0.41 | 1.11 |
| flex ddG           | Small-to-large mutation(s)          | 2500         | 0.56 | 0.89 |
| flex ddG           | Small-to-large mutation(s)          | 10000        | 0.62 | 0.84 |
| flex ddG           | Small-to-large mutation(s)          | 20000        | 0.63 | 0.82 |
| flex ddG           | Small-to-large mutation(s)          | 30000        | 0.65 | 0.80 |
| flex ddG           | Small-to-large mutation(s)          | 35000        | 0.65 | 0.78 |
| flex ddG           | Small-to-large mutation(s)          | 40000        | 0.63 | 0.81 |
| flex ddG           | Small-to-large mutation(s)          | 50000        | 0.65 | 0.82 |
| no backrub control | Multiple mutations, none to alanine | 0            | 0.44 | 1.66 |
| flex ddG           | Multiple mutations, none to alanine | 2500         | 0.61 | 1.44 |
| flex ddG           | Multiple mutations, none to alanine | 10000        | 0.65 | 1.40 |
| flex ddG           | Multiple mutations, none to alanine | 20000        | 0.62 | 1.40 |
| flex ddG           | Multiple mutations, none to alanine | 30000        | 0.62 | 1.39 |
| flex ddG           | Multiple mutations, none to alanine | 35000        | 0.63 | 1.38 |
| flex ddG           | Multiple mutations, none to alanine | 40000        | 0.64 | 1.39 |
| flex ddG           | Multiple mutations, none to alanine | 50000        | 0.61 | 1.36 |
| no backrub control | Single mutation to alanine          | 0            | 0.44 | 0.90 |
| flex ddG           | Single mutation to alanine          | 2500         | 0.50 | 0.78 |
| flex ddG           | Single mutation to alanine          | 10000        | 0.50 | 0.76 |
| flex ddG           | Single mutation to alanine          | 20000        | 0.50 | 0.75 |
| flex ddG           | Single mutation to alanine          | 30000        | 0.51 | 0.75 |
| flex ddG           | Single mutation to alanine          | 35000        | 0.51 | 0.75 |
| flex ddG           | Single mutation to alanine          | 40000        | 0.51 | 0.75 |
| flex ddG           | Single mutation to alanine          | 50000        | 0.52 | 0.73 |

**Table S8: Performance comparison of the standard flex ddG protocol (using Rosetta’s Talaris energy function) with flex ddG run with the REF score function, and 35000 backrub steps. Data for the flex ddG method with the Talaris energy function are as in Table 2 in the main text. “res  $\leq$  1.5 Ang.” indicates data points for which the resolution of the input wild-type crystal structure is less than or equal to 1.5 Å. N = number of cases in the dataset or subset. R = Pearson’s R. MAE = Mean Absolute Error. FC = Fraction Correct. Best performance for each metric and dataset is shown in bold.**

| Mutation Category          | Prediction Method     | N    | R           | MAE         | FC          |
|----------------------------|-----------------------|------|-------------|-------------|-------------|
| Complete dataset           | flex ddG              | 1240 | <b>0.63</b> | <b>0.96</b> | <b>0.76</b> |
|                            | flex ddG (REF energy) |      | <b>0.63</b> | 1.19        | 0.75        |
| Small-to-large mutation(s) | flex ddG              | 130  | <b>0.65</b> | <b>0.78</b> | 0.71        |
|                            | flex ddG (REF energy) |      | 0.57        | 1.01        | <b>0.72</b> |
| Single mutation to alanine | flex ddG              | 748  | <b>0.51</b> | <b>0.75</b> | <b>0.76</b> |
|                            | flex ddG (REF energy) |      | 0.49        | 0.90        | 0.74        |
| Multiple mutations         | flex ddG              | 273  | <b>0.62</b> | <b>1.62</b> | 0.78        |
|                            | flex ddG (REF energy) |      | 0.59        | 2.12        | <b>0.80</b> |
| Res. $\leq$ 1.5 Ang.       | flex ddG              | 52   | 0.47        | <b>0.93</b> | 0.73        |
|                            | flex ddG (REF energy) |      | <b>0.65</b> | 1.10        | <b>0.75</b> |
| Res. $\geq$ 2.5 Ang.       | flex ddG              | 457  | <b>0.49</b> | <b>0.73</b> | <b>0.76</b> |
|                            | flex ddG (REF energy) |      | 0.48        | 0.90        | 0.75        |

**Table S9: Performance for GAM-fit predictions on the complete benchmark data set, with Talaris<sup>S1-S3</sup> and REF<sup>S4</sup> energy functions. Backrub steps = 35000. N = number of cases in the dataset. R = Pearson’s R. MAE = Mean Absolute Error. FC = Fraction Correct.**

| Prediction Method      | N    | R    | MAE  | FC   |
|------------------------|------|------|------|------|
| Flex ddG (Talaris) GAM | 1240 | 0.68 | 0.88 | 0.76 |
| Flex ddG (REF) GAM     |      | 0.68 | 0.88 | 0.75 |
| No backrub control GAM |      | 0.62 | 0.93 | 0.75 |

**Table S10: Selection of key data shown in Fig. S3**

| Run                | Subset      | Models | R    | MAE  |
|--------------------|-------------|--------|------|------|
| flex ddG           | Loop        | 1      | 0.62 | 1.29 |
| flex ddG           | Loop        | 20     | 0.75 | 1.00 |
| flex ddG           | Loop        | 30     | 0.75 | 1.00 |
| flex ddG           | Loop        | 40     | 0.75 | 1.00 |
| flex ddG           | Loop        | 50     | 0.75 | 0.99 |
| no backrub control | Loop        | 1      | 0.66 | 1.16 |
| no backrub control | Loop        | 20     | 0.66 | 1.17 |
| no backrub control | Loop        | 30     | 0.66 | 1.17 |
| no backrub control | Loop        | 40     | 0.66 | 1.17 |
| no backrub control | Loop        | 50     | 0.66 | 1.17 |
| flex ddG           | Alpha Helix | 1      | 0.42 | 1.15 |
| flex ddG           | Alpha Helix | 20     | 0.51 | 0.91 |
| flex ddG           | Alpha Helix | 30     | 0.53 | 0.88 |
| flex ddG           | Alpha Helix | 40     | 0.53 | 0.88 |
| flex ddG           | Alpha Helix | 50     | 0.52 | 0.88 |
| no backrub control | Alpha Helix | 1      | 0.41 | 1.13 |
| no backrub control | Alpha Helix | 20     | 0.41 | 1.11 |
| no backrub control | Alpha Helix | 30     | 0.41 | 1.12 |
| no backrub control | Alpha Helix | 40     | 0.41 | 1.12 |
| no backrub control | Alpha Helix | 50     | 0.41 | 1.12 |
| flex ddG           | Strand      | 1      | 0.46 | 1.09 |
| flex ddG           | Strand      | 20     | 0.57 | 0.82 |
| flex ddG           | Strand      | 30     | 0.58 | 0.81 |
| flex ddG           | Strand      | 40     | 0.58 | 0.82 |
| flex ddG           | Strand      | 50     | 0.58 | 0.82 |
| no backrub control | Strand      | 1      | 0.52 | 0.96 |
| no backrub control | Strand      | 20     | 0.53 | 0.95 |
| no backrub control | Strand      | 30     | 0.53 | 0.95 |
| no backrub control | Strand      | 40     | 0.53 | 0.95 |
| no backrub control | Strand      | 50     | 0.53 | 0.95 |
| flex ddG           | Turn        | 1      | 0.60 | 1.14 |
| flex ddG           | Turn        | 20     | 0.70 | 0.94 |
| flex ddG           | Turn        | 30     | 0.71 | 0.92 |
| flex ddG           | Turn        | 40     | 0.70 | 0.93 |
| flex ddG           | Turn        | 50     | 0.70 | 0.92 |
| no backrub control | Turn        | 1      | 0.68 | 0.98 |
| no backrub control | Turn        | 20     | 0.67 | 0.98 |
| no backrub control | Turn        | 30     | 0.67 | 0.98 |
| no backrub control | Turn        | 40     | 0.67 | 0.98 |
| no backrub control | Turn        | 50     | 0.67 | 0.98 |

**Table S11: Selection of key data shown in Fig. S4**

| Run                | Subset                        | Models | R    | MAE  |
|--------------------|-------------------------------|--------|------|------|
| flex ddG           | Mean burial score < 0.10      | 1      | 0.51 | 1.63 |
| flex ddG           | Mean burial score < 0.10      | 20     | 0.56 | 1.39 |
| flex ddG           | Mean burial score < 0.10      | 30     | 0.56 | 1.38 |
| flex ddG           | Mean burial score < 0.10      | 40     | 0.56 | 1.37 |
| flex ddG           | Mean burial score < 0.10      | 50     | 0.56 | 1.37 |
| no backrub control | Mean burial score < 0.10      | 1      | 0.49 | 1.57 |
| no backrub control | Mean burial score < 0.10      | 20     | 0.50 | 1.56 |
| no backrub control | Mean burial score < 0.10      | 30     | 0.50 | 1.57 |
| no backrub control | Mean burial score < 0.10      | 40     | 0.50 | 1.57 |
| no backrub control | Mean burial score < 0.10      | 50     | 0.50 | 1.57 |
| flex ddG           | Mean burial score $\geq$ 0.10 | 1      | 0.50 | 1.03 |
| flex ddG           | Mean burial score $\geq$ 0.10 | 20     | 0.64 | 0.75 |
| flex ddG           | Mean burial score $\geq$ 0.10 | 30     | 0.65 | 0.74 |
| flex ddG           | Mean burial score $\geq$ 0.10 | 40     | 0.64 | 0.74 |
| flex ddG           | Mean burial score $\geq$ 0.10 | 50     | 0.64 | 0.74 |
| no backrub control | Mean burial score $\geq$ 0.10 | 1      | 0.57 | 0.88 |
| no backrub control | Mean burial score $\geq$ 0.10 | 20     | 0.57 | 0.88 |
| no backrub control | Mean burial score $\geq$ 0.10 | 30     | 0.57 | 0.88 |
| no backrub control | Mean burial score $\geq$ 0.10 | 40     | 0.57 | 0.88 |
| no backrub control | Mean burial score $\geq$ 0.10 | 50     | 0.57 | 0.88 |
| flex ddG           | Mean burial score < 0.25      | 1      | 0.52 | 1.48 |
| flex ddG           | Mean burial score < 0.25      | 20     | 0.59 | 1.21 |
| flex ddG           | Mean burial score < 0.25      | 30     | 0.60 | 1.20 |
| flex ddG           | Mean burial score < 0.25      | 40     | 0.60 | 1.19 |
| flex ddG           | Mean burial score < 0.25      | 50     | 0.60 | 1.19 |
| no backrub control | Mean burial score < 0.25      | 1      | 0.54 | 1.37 |
| no backrub control | Mean burial score < 0.25      | 20     | 0.54 | 1.36 |
| no backrub control | Mean burial score < 0.25      | 30     | 0.54 | 1.36 |
| no backrub control | Mean burial score < 0.25      | 40     | 0.54 | 1.36 |
| no backrub control | Mean burial score < 0.25      | 50     | 0.54 | 1.36 |
| flex ddG           | Mean burial score $\geq$ 0.25 | 1      | 0.41 | 0.86 |
| flex ddG           | Mean burial score $\geq$ 0.25 | 20     | 0.56 | 0.62 |
| flex ddG           | Mean burial score $\geq$ 0.25 | 30     | 0.57 | 0.60 |
| flex ddG           | Mean burial score $\geq$ 0.25 | 40     | 0.56 | 0.61 |
| flex ddG           | Mean burial score $\geq$ 0.25 | 50     | 0.56 | 0.61 |
| no backrub control | Mean burial score $\geq$ 0.25 | 1      | 0.46 | 0.73 |
| no backrub control | Mean burial score $\geq$ 0.25 | 20     | 0.44 | 0.74 |
| no backrub control | Mean burial score $\geq$ 0.25 | 30     | 0.44 | 0.74 |
| no backrub control | Mean burial score $\geq$ 0.25 | 40     | 0.44 | 0.74 |
| no backrub control | Mean burial score $\geq$ 0.25 | 50     | 0.44 | 0.74 |



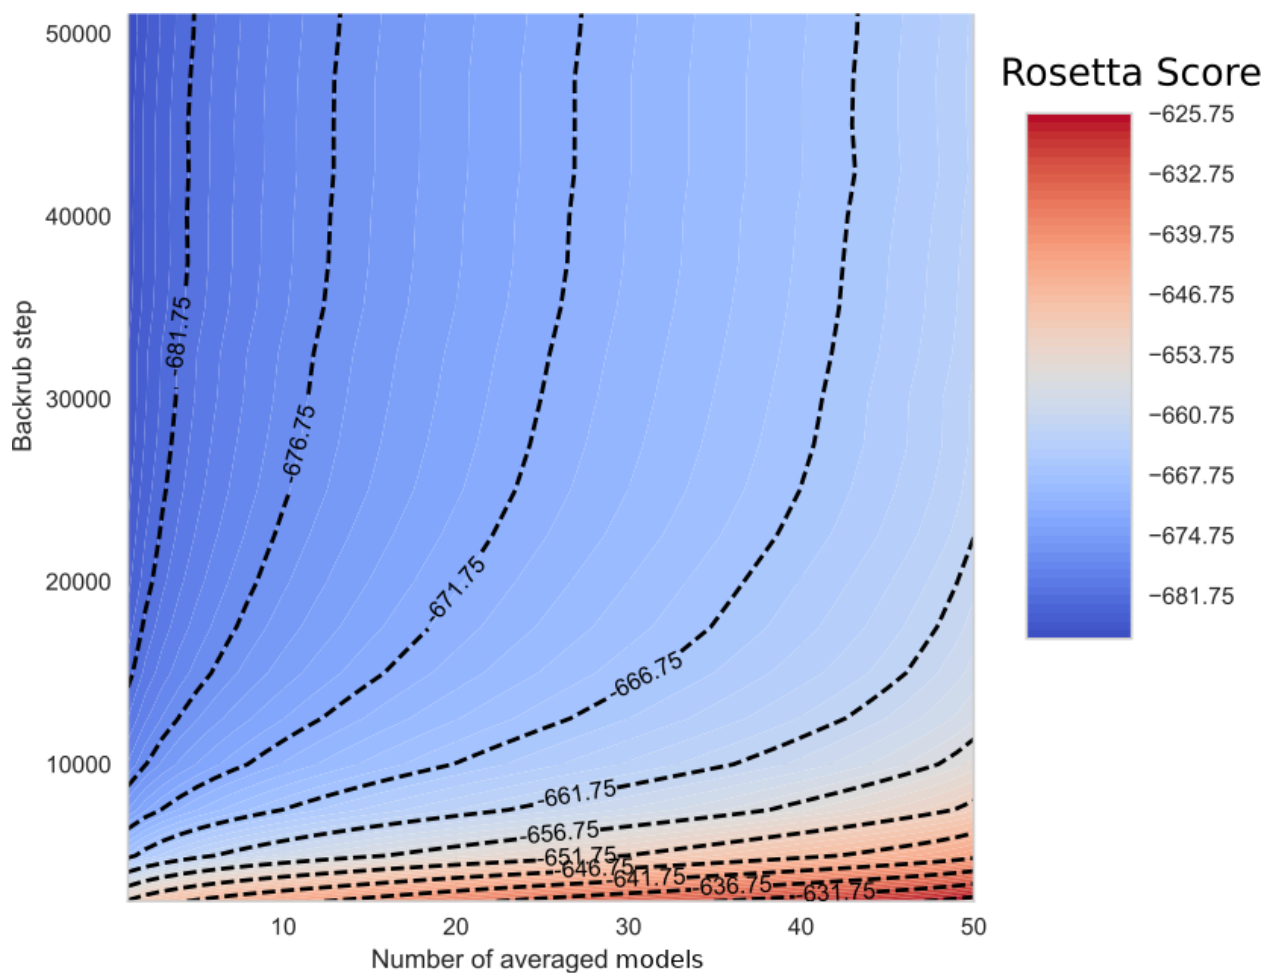

Figure S1: Contour plot showing the effect of backrub sampling on the average wild-type complex score, for increasing numbers of averaged models. As the number of averaged models is increased along the x-axis, the average total score of the ensemble of wild-type complex models (shown as colored contours in the body of the plot) also increases, as the wild-type complex models are first sorted according to their total scores and included in the averaged ensemble in order of increasing score. As the number of backrub sampling steps at which the ensemble is generated increases (along the y-axis), the total score of an ensemble of any number of models tends to decrease, indicating that flex ddG is able to find lower-energy conformations (as measured by the Rosetta energy function) as the simulation progresses. However, using only the lowest energy models does not produce higher correlations with experimental  $\Delta\Delta G$  values, as shown in Fig. 3. Rosetta scores are in Rosetta Energy Units (REU) using the Rosetta Talaris energy function.<sup>S1-S3</sup>

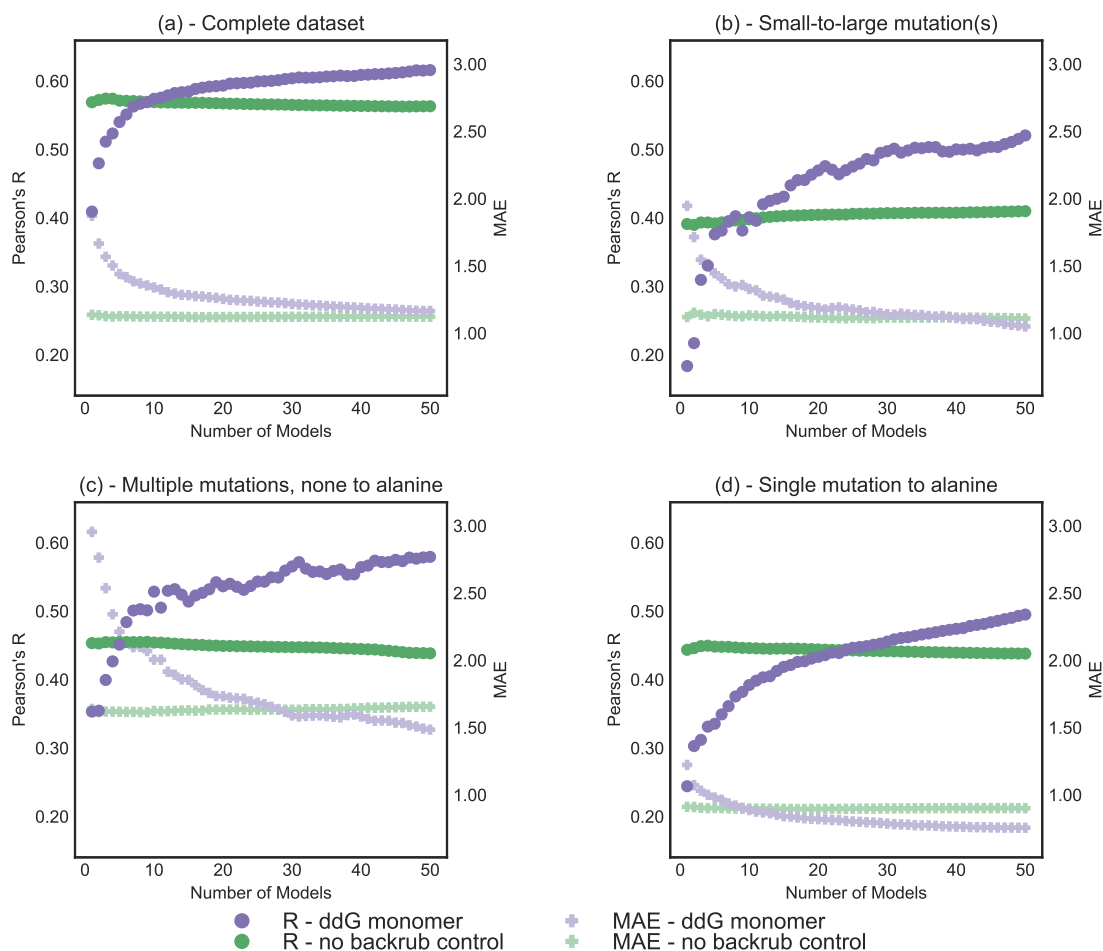

Figure S2: Correlation (Pearson's R, left y-axis) and MAE (Mean Absolute Error, right y-axis) vs. number of averaged models (x-axis), on the complete ZEMu set, and subsets. Pearson's R is shown as circles, and MAE as faded pluses. Predictions generated with the `ddg_monomer` protocol are shown in purple. Predictions generated with the `no backrub control` protocol are shown in green. A selection of key data underlying this figure can be found in Table S5. Structures are sorted by their minimized wild-type complex energy. (a) Complete dataset (n = 1240) (b) Small-to-large mutation(s) (n = 130) (c) Multiple mutations, none to alanine (n = 45) (d) Single mutation to alanine (n = 748).

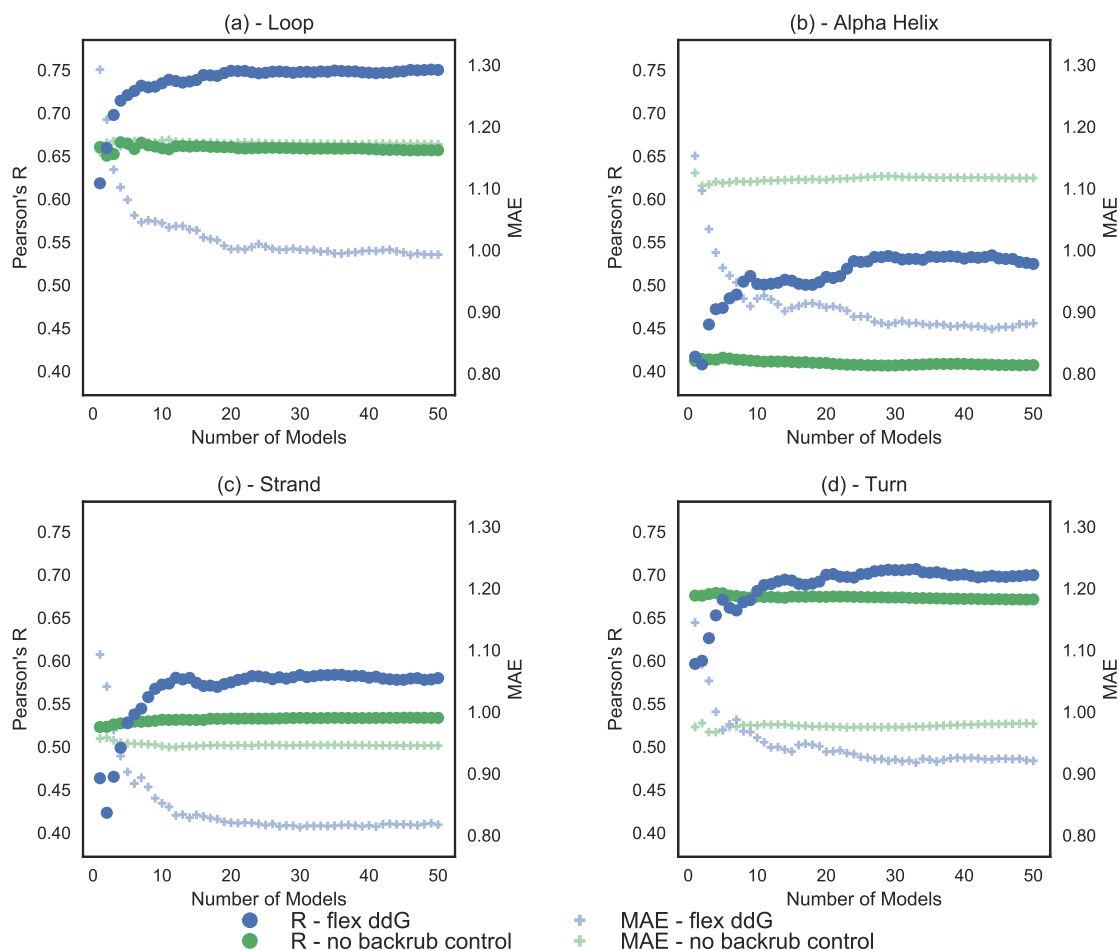

Figure S3: Correlation (Pearson's R, left y-axis) and MAE (Mean Absolute Error, right y-axis) vs. number of averaged models (x-axis), on subsets of the complete ZEMu set binned by DSSP-assigned<sup>S5,S6</sup> secondary structure at the mutation site. For cases with multiple mutations, all mutation sites must share the same secondary structure to be considered. Pearson's R is shown as circles, and MAE as faded pluses. Predictions generated with the Flex ddG protocol are shown in blue. Predictions generated with the no backrub control protocol are shown in green. A selection of key data underlying this figure can be found in Table S10. Flex ddG is run with 35000 backrub steps. Structures are not sorted, and are randomly added to the ensemble. (a) Loop (n = 349) (b) Alpha helix (n = 198) (c) Strand (n = 280) (d) Turn (n = 183).

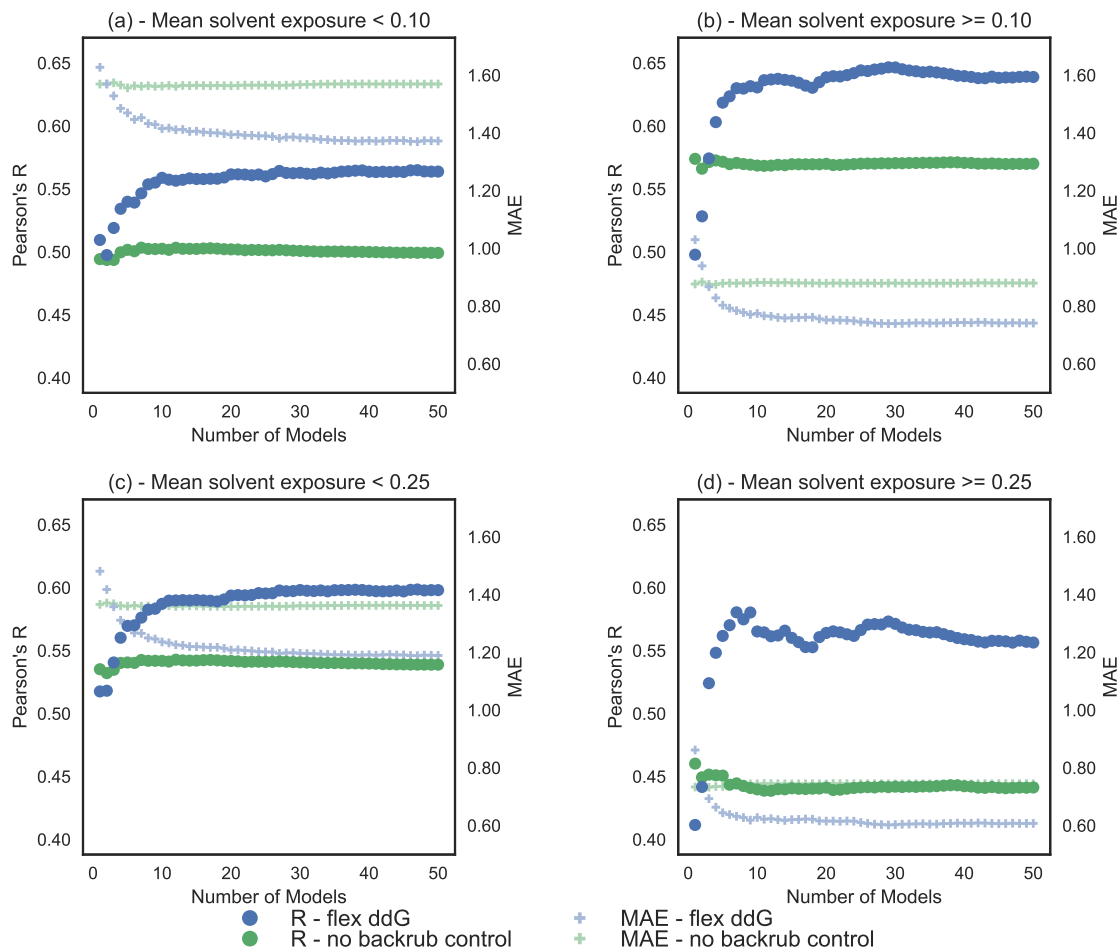

Figure S4: Correlation (Pearson's R, left y-axis) and MAE (Mean Absolute Error, right y-axis) vs. number of averaged models (x-axis), on subsets of the complete ZEMu set binned by DSSP-calculated<sup>S5,S6</sup> solvent exposure. Solvent exposure is calculated for all mutation position sites in the context of the input wild type crystal structure. For dataset cases with multiple mutation positions, solvent exposure is averaged. Pearson's R is shown as circles, and MAE as faded pluses. Predictions generated with the Flex ddG protocol are shown in blue. Predictions generated with the no backrub control protocol are shown in green. A selection of key data underlying this figure can be found in Table S11. Flex ddG is run with 35000 backrub steps. Structures are not sorted, and are randomly added to the ensemble. (a) Mean solvent exposure < 0.10 (n = 436) (b) Mean solvent exposure  $\geq 0.10$  (n = 804) (c) Mean solvent exposure < 0.25 (n = 758) (d) Mean solvent exposure  $\geq 0.25$  (n = 482).

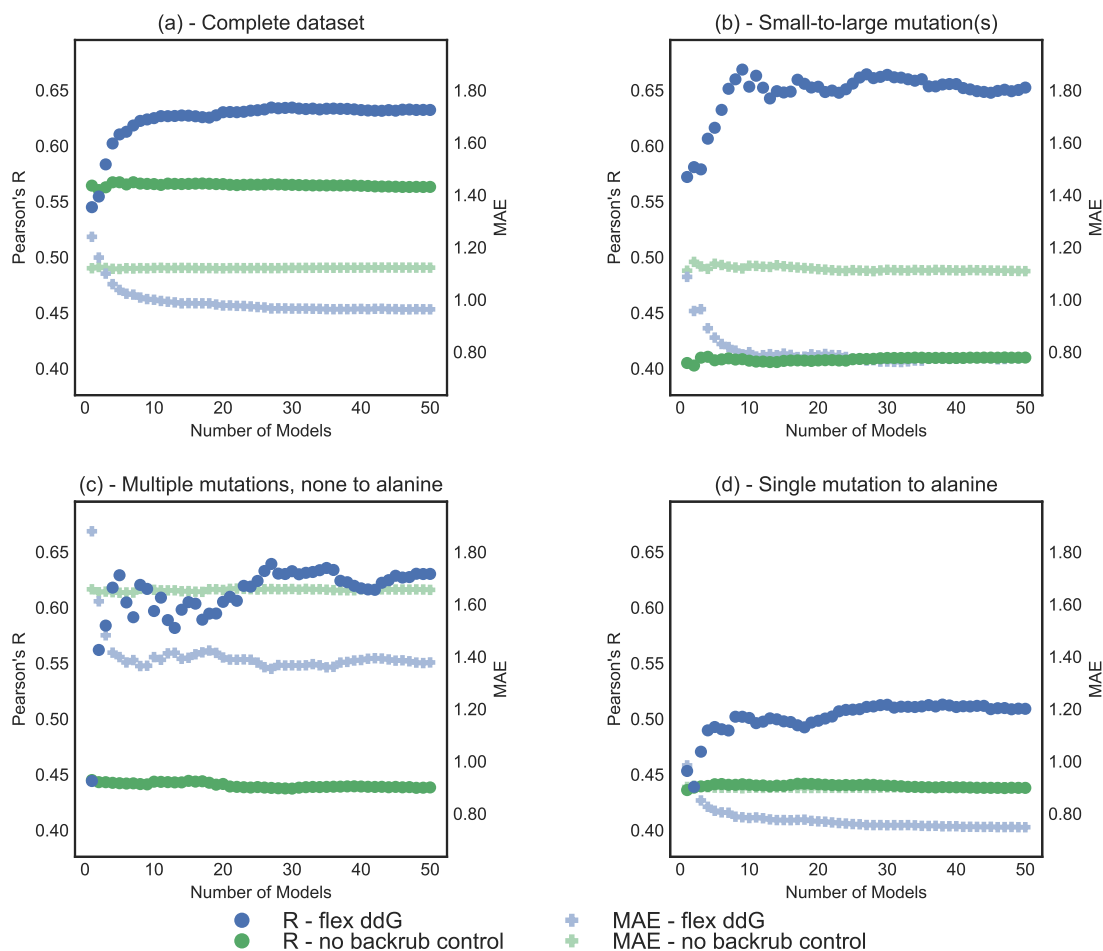

Figure S5: Correlation (Pearson's R, left y-axis) and MAE (Mean Absolute Error, right y-axis) vs. number of averaged models (x-axis), on the complete ZEMu set, and subsets. This plot is analogous to Fig. 3 in the main manuscript, except that the models used for averaging are not sorted by score. Pearson's R is shown as circles, and MAE as faded pluses. Predictions generated with the Flex ddG protocol are shown in blue. Predictions generated with the no backrub control protocol are shown in green. A selection of key data underlying this figure can be found in Table S6. Flex ddG is run with 35000 backrub steps. Structures are not sorted, and are randomly added to the ensemble. (a) Complete dataset ( $n = 1240$ ) (b) Small-to-large mutation(s) ( $n = 130$ ) (c) Multiple mutations, none to alanine ( $n = 45$ ) (d) Single mutation to alanine ( $n = 748$ ).

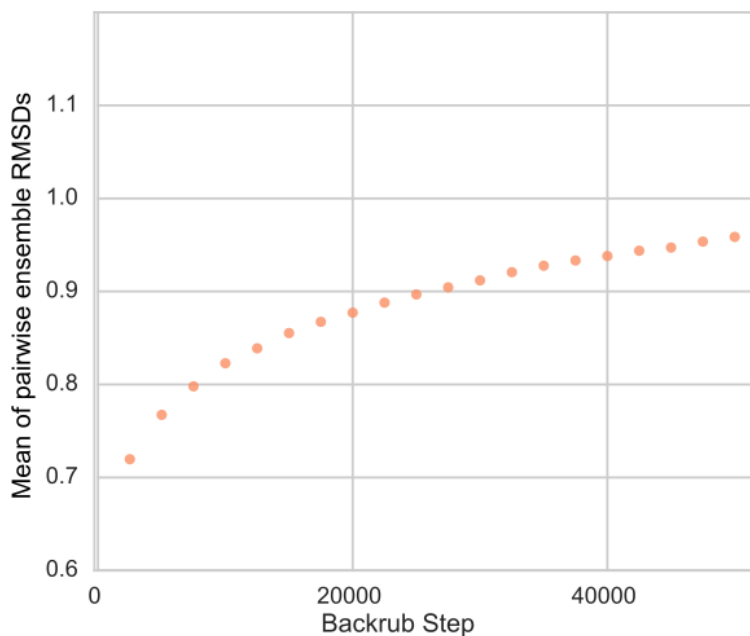

Figure S6: The average pairwise ensemble RMSD for each ensemble of 50 models is shown versus increasing backrub sampling steps. Average pairwise RMSD is computed on all atoms in residues selected as neighborhood pivot residues. To calculate pairwise RMSD, this selection of atoms is superimposed onto their positions in the last output model in the backrub trajectory before pairwise RMSDs are computed. Pairwise ensemble RMSD increases with increasing backrub sampling steps, indicating that the diversity of sampled models (as measured by RMSD) continues to increase past the point around 30k-35k sampling steps where correlation with experimental  $\Delta\Delta G$  values levels out. RMSD shown is calculated for 1216 out of 1240 of the total points in the dataset.

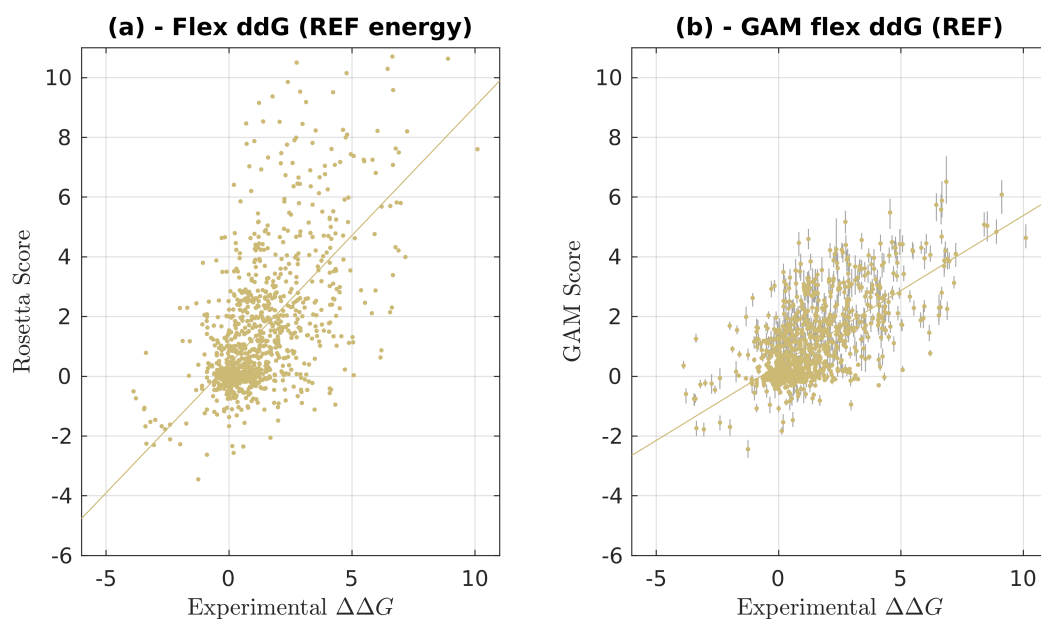

Figure S7: Experimentally determined  $\Delta\Delta G$  values (x-axis) versus predictions. The error bars in gray represent the range from minimum to maximum fit predicted  $\Delta\Delta G$  value for the 1000 sampled GAM (Generalized Additive Model) models. A line of best fit is shown. **(a)**: standard Rosetta output (non-fitted REF predictions) vs. experimental  $\Delta\Delta G$  values. **(b)**: GAM flex ddG predictions vs. experimental data. This plot is analogous to Fig. 5b in the main text, except that GAM scores are refit from values in Rosetta Energy Units (REU) using the Rosetta REF<sup>S4</sup> energy function (instead of Talaris<sup>S1-S3</sup>).

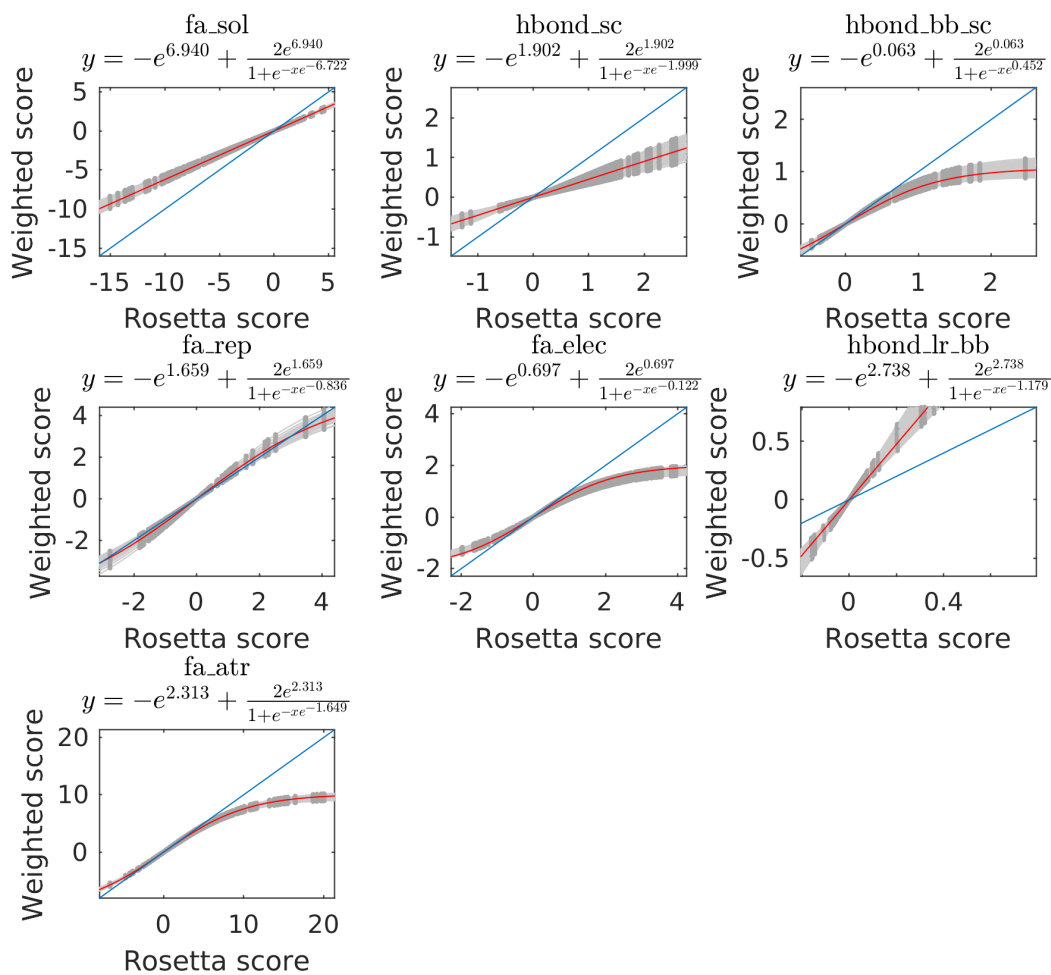

Figure S8: Sigmoid functions resulting from application of unbiased logistic scaling to individual Rosetta score terms (generated using the flex ddG protocol and the Talaris energy function<sup>S1-S3</sup>) in a generalized additive model. Extreme values for most score terms are downweighted, except for long-range hydrogen bond interactions between backbone atoms, which only make minor contributions (hbond\_lr\_bb).



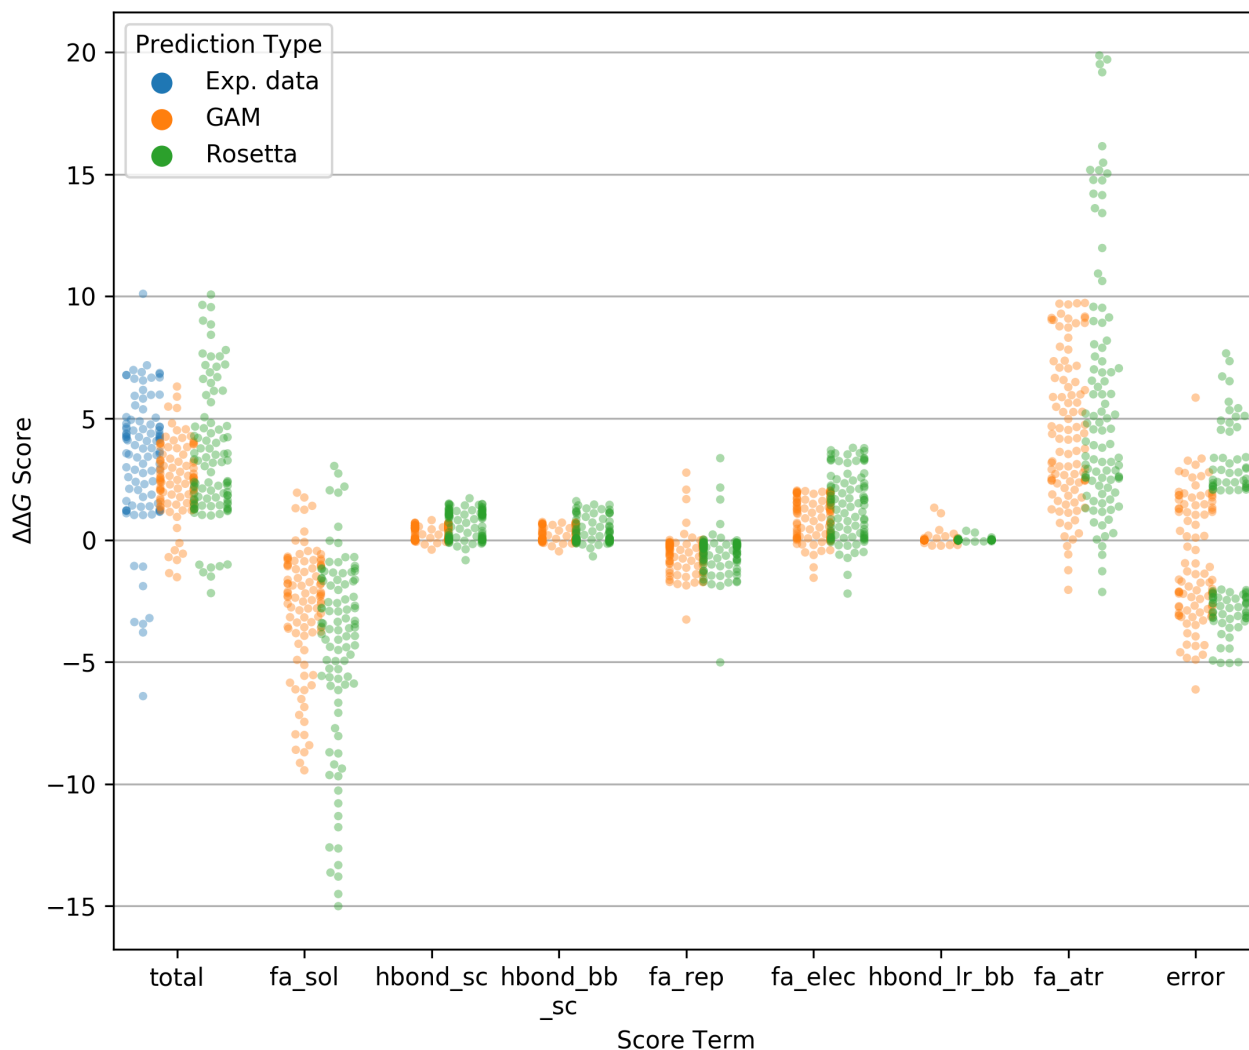

Figure S9: Total  $\Delta\Delta G$  predictions and partial Rosetta score terms (Talaris energy function<sup>S1-S3</sup>). On the far left, total scores for the original Rosetta predictions are shown in green alongside GAM-fit predictions in orange and the experimentally determined values in blue. On the far right, the error ( $\Delta\Delta G_{predicted} - \Delta\Delta G_{experimental}$ ) is shown. Intermediate strips show the 7 partial Rosetta score terms (fa\_sol, hbond\_sc, hbond\_bb\_sc, hbond\_lr\_bb, fa\_rep, fa\_elec, and fa\_atr) which together equal the total  $\Delta\Delta G$  score on the far left. Points shown are filtered from the complete prediction set according to the following criteria: neutral mutations are removed ( $-1.0 < \text{experimental } \Delta\Delta G$  or Rosetta predicted  $\Delta\Delta G$  score  $< 1.0$ ). Also removed are points where the absolute value of the error of the original Rosetta prediction is less than 2.0

**Dataset S1: Curated ZEMu dataset with experimental  $\Delta\Delta G$  values**

| ID | PDB  | Res. | Mutations              | $\Delta\Delta G$ |
|----|------|------|------------------------|------------------|
| 1  | 1TM1 | 1.7  | I Y61A                 | 2.20             |
| 2  | 1TM1 | 1.7  | I Y61G                 | 4.69             |
| 3  | 1TM1 | 1.7  | I R65A                 | 3.08             |
| 4  | 1TM1 | 1.7  | I R67A                 | 2.93             |
| 5  | 1TM1 | 1.7  | I R67C                 | 3.24             |
| 6  | 1TM1 | 1.7  | I R67A;I R65A          | 5.07             |
| 7  | 1CBW | 2.6  | I K15A                 | 1.99             |
| 8  | 1A4Y | 2    | A Y434F                | 0.56             |
| 9  | 1A4Y | 2    | A Y437F                | 0.25             |
| 10 | 1A4Y | 2    | A Y434A;A D435A        | 6.81             |
| 11 | 1A4Y | 2    | A Y434A;A Y437A        | 6.64             |
| 12 | 1A4Y | 2    | B R5A;A Y434A          | 6.97             |
| 13 | 1A4Y | 2    | B R5A;A D435A          | 6.76             |
| 14 | 1A4Y | 2    | A D435A;B R5A;A Y434A  | 10.10            |
| 15 | 1A4Y | 2    | A Y434A;B R5A;A Y437A  | 8.53             |
| 16 | 1A4Y | 2    | B K40G                 | 3.23             |
| 17 | 1A4Y | 2    | B K40G;A Y434F         | 6.66             |
| 18 | 1A4Y | 2    | A D435A;B K40G         | 4.11             |
| 19 | 1A4Y | 2    | B K40G;A Y437A         | 6.45             |
| 20 | 1A4Y | 2    | B K40G;A Y434A;A D435A | 6.20             |
| 21 | 1A4Y | 2    | B K40G;A Y437A;A Y434A | 9.12             |
| 22 | 1DFJ | 2.5  | I Y430F                | 0.12             |
| 23 | 1DFJ | 2.5  | I Y433F                | 2.15             |
| 24 | 1DFJ | 2.5  | I Y430A;I D431A        | 7.17             |
| 25 | 1DFJ | 2.5  | I Y430A;I Y433A        | 7.24             |
| 26 | 1FCC | 3.2  | C T25A                 | 0.24             |

**Dataset S1: Curated ZEMu dataset with experimental  $\Delta\Delta G$  values**

| ID | PDB  | Res. | Mutations     | $\Delta\Delta G$ |
|----|------|------|---------------|------------------|
| 27 | 1FCC | 3.2  | C K28A        | 1.26             |
| 28 | 1FCC | 3.2  | C K31A        | 3.48             |
| 29 | 1FCC | 3.2  | C N35A        | 2.36             |
| 30 | 1FCC | 3.2  | C D40A        | 0.27             |
| 31 | 1FCC | 3.2  | C E42A        | 0.39             |
| 32 | 1FCC | 3.2  | C W43A        | 3.77             |
| 33 | 1FCC | 3.2  | C Y45A;C T44A | 1.95             |
| 34 | 1XD3 | 1.45 | B K6A         | 1.38             |
| 35 | 1XD3 | 1.45 | B K27A        | -0.06            |
| 36 | 1XD3 | 1.45 | B R42L        | -0.88            |
| 37 | 1XD3 | 1.45 | B R54L        | 0.89             |
| 38 | 1XD3 | 1.45 | B H68N        | 0.00             |
| 39 | 1XD3 | 1.45 | B R72L        | 1.33             |
| 40 | 1XD3 | 1.45 | B R74L        | 2.43             |
| 41 | 1XD3 | 1.45 | B E24A        | -0.25            |
| 42 | 1XD3 | 1.45 | B D39A        | -0.42            |
| 43 | 1XD3 | 1.45 | B E51A        | 1.57             |
| 44 | 1XD3 | 1.45 | B D52A        | -0.25            |
| 45 | 1XD3 | 1.45 | B D58A        | -0.25            |
| 46 | 1XD3 | 1.45 | B K6R         | 0.31             |
| 47 | 1XD3 | 1.45 | B L8A         | 2.74             |
| 48 | 1XD3 | 1.45 | B K11R        | 1.43             |
| 49 | 1XD3 | 1.45 | B K27R        | 0.27             |
| 50 | 1XD3 | 1.45 | B K33R        | 0.00             |
| 51 | 1XD3 | 1.45 | B I44A        | 0.27             |
| 52 | 1JTG | 1.73 | A S235A       | 1.24             |

**Dataset S1: Curated ZEMu dataset with experimental  $\Delta\Delta G$  values**

| ID | PDB  | Res. | Mutations                       | $\Delta\Delta G$ |
|----|------|------|---------------------------------|------------------|
| 53 | 1JTG | 1.73 | A S130A                         | 0.79             |
| 54 | 1JTG | 1.73 | A R243A                         | 1.27             |
| 55 | 1JTG | 1.73 | A K234A                         | 1.03             |
| 56 | 1JTG | 1.73 | A R243A;A S130A                 | 1.85             |
| 57 | 1JTG | 1.73 | A S130A;A K234A                 | 1.98             |
| 58 | 1JTG | 1.73 | A S130A;A R243A;A S235A         | 1.69             |
| 59 | 1JTG | 1.73 | A S130A;A K234A;A S235A         | 1.85             |
| 60 | 1JTG | 1.73 | A R243A;A K234A                 | 2.73             |
| 61 | 1JTG | 1.73 | A K234A;A S235A;A R243A         | 2.72             |
| 62 | 1JTG | 1.73 | A S130A;A R243A;A K234A         | 2.51             |
| 63 | 1JTG | 1.73 | A S130A;A R243A;A S235A;A K234A | 2.79             |
| 64 | 1DQJ | 2    | C Y20A                          | 3.29             |
| 65 | 1DQJ | 2    | C R21A                          | 1.17             |
| 66 | 1DQJ | 2    | C W63A                          | 1.35             |
| 67 | 1DQJ | 2    | C K97A                          | 3.52             |
| 68 | 1DQJ | 2    | C D101A                         | 1.45             |
| 69 | 2I9B | 2.8  | E R137A                         | -0.29            |
| 70 | 2I9B | 2.8  | E K139A                         | 0.67             |
| 71 | 2I9B | 2.8  | E R142A                         | 0.36             |
| 72 | 2I9B | 2.8  | E H143A                         | 0.66             |
| 73 | 2I9B | 2.8  | E R145A                         | 0.42             |
| 74 | 1JTG | 1.73 | B T32K                          | 0.20             |
| 75 | 1JTG | 1.73 | B V93K                          | -0.48            |
| 76 | 1JTG | 1.73 | B T140K                         | -0.02            |
| 77 | 1JTG | 1.73 | B N89K                          | -0.46            |
| 78 | 1JTG | 1.73 | B D163A                         | -1.34            |

**Dataset S1: Curated ZEMu dataset with experimental  $\Delta\Delta G$  values**

| ID  | PDB  | Res. | Mutations                      | $\Delta\Delta G$ |
|-----|------|------|--------------------------------|------------------|
| 79  | 1JTG | 1.73 | B D163K                        | -1.99            |
| 80  | 1JTG | 1.73 | B T140K;B Q157K                | -0.40            |
| 81  | 1JTG | 1.73 | B D163K;B V165K;B N89K         | -2.40            |
| 82  | 1JTG | 1.73 | B D163K;B D135K;B V134K        | -3.06            |
| 83  | 1JTG | 1.73 | B D163K;B V165K;B D135K;B N89K | -3.36            |
| 84  | 1F47 | 1.95 | A D4A                          | 0.69             |
| 85  | 1F47 | 1.95 | A Y5A                          | 0.87             |
| 86  | 1F47 | 1.95 | A L6A                          | 0.93             |
| 87  | 1F47 | 1.95 | A D7A                          | 1.73             |
| 88  | 1F47 | 1.95 | A I8A                          | 2.52             |
| 89  | 1F47 | 1.95 | A P9A                          | -0.06            |
| 90  | 1F47 | 1.95 | A F11A                         | 2.44             |
| 91  | 1F47 | 1.95 | A L12A                         | 2.29             |
| 92  | 1F47 | 1.95 | A K14A                         | -0.04            |
| 93  | 1F47 | 1.95 | A Q15A                         | -0.05            |
| 94  | 1REW | 1.86 | A D30A;B D30A                  | 0.67             |
| 95  | 1REW | 1.86 | B W31A;A W31A                  | 1.09             |
| 96  | 1REW | 1.86 | B D30A;A W31A;B W31A;A D30A    | 2.06             |
| 97  | 1REW | 1.86 | B F49A;A F49A                  | 1.36             |
| 98  | 1REW | 1.86 | B P50A;A P50A                  | 1.29             |
| 99  | 1REW | 1.86 | B P50A;A F49A;B F49A;A P50A    | 2.88             |
| 100 | 1REW | 1.86 | B H39D;A H39D                  | 0.20             |
| 101 | 1REW | 1.86 | A S88A;B S88A                  | 0.20             |
| 102 | 1REW | 1.86 | B L100A;A L100A                | 0.23             |
| 103 | 1REW | 1.86 | A S88A;B S88A;A H39D;B H39D    | 0.18             |
| 104 | 1REW | 1.86 | B L100A;A H39D;B H39D;A L100A  | 0.12             |

**Dataset S1: Curated ZEMu dataset with experimental  $\Delta\Delta G$  values**

| ID  | PDB  | Res. | Mutations                     | $\Delta\Delta G$ |
|-----|------|------|-------------------------------|------------------|
| 105 | 1REW | 1.86 | B A34D;A A34D                 | 0.00             |
| 106 | 1REW | 1.86 | A D53A;B D53A                 | -0.05            |
| 107 | 1REW | 1.86 | B E109R;A E109R               | 0.27             |
| 108 | 1REW | 1.86 | B A34D;A D30A;B D30A;A A34D   | 0.48             |
| 109 | 1REW | 1.86 | A D53A;B D53A;A A34D;B A34D   | -0.18            |
| 110 | 1REW | 1.86 | B E109R;A D53A;B D53A;A E109R | 0.04             |
| 111 | 1DFJ | 2.5  | I V428A;I Q426A               | 0.94             |
| 112 | 1DFJ | 2.5  | I E436A;I W434A;I T435A       | 1.98             |
| 113 | 1DFJ | 2.5  | I R453A                       | 0.85             |
| 114 | 1DFJ | 2.5  | I I455A                       | 0.33             |
| 115 | 1A4Y | 2    | A Q430A;A V432A               | 0.06             |
| 116 | 1A4Y | 2    | A S439A;A E440A;A W438A       | 1.83             |
| 117 | 1A4Y | 2    | A R457A                       | -0.22            |
| 118 | 1A4Y | 2    | A I459A                       | 0.67             |
| 119 | 1DFJ | 2.5  | I E202A                       | 1.02             |
| 120 | 1DFJ | 2.5  | I W257A                       | 1.33             |
| 121 | 1DFJ | 2.5  | I W259A                       | 2.22             |
| 122 | 1DFJ | 2.5  | I E283A                       | 1.32             |
| 123 | 1DFJ | 2.5  | I S285A                       | 0.80             |
| 124 | 1DFJ | 2.5  | I W314A                       | 0.99             |
| 125 | 1DFJ | 2.5  | I K316A                       | 1.30             |
| 126 | 1DFJ | 2.5  | I E340A                       | 1.57             |
| 127 | 1DFJ | 2.5  | I E397A                       | 1.31             |
| 128 | 1A4Y | 2    | B H84A                        | 0.17             |
| 129 | 1A4Y | 2    | B W89A                        | 0.23             |
| 130 | 1A4Y | 2    | A W261A                       | 0.09             |

**Dataset S1: Curated ZEMu dataset with experimental  $\Delta\Delta G$  values**

| ID  | PDB  | Res. | Mutations | $\Delta\Delta G$ |
|-----|------|------|-----------|------------------|
| 131 | 1A4Y | 2    | A W263A   | 1.16             |
| 132 | 1A4Y | 2    | A E287A   | 0.09             |
| 133 | 1A4Y | 2    | A S289A   | 0.03             |
| 134 | 1A4Y | 2    | A W318A   | 1.48             |
| 135 | 1A4Y | 2    | A K320A   | -0.31            |
| 136 | 1A4Y | 2    | A E344A   | 0.16             |
| 137 | 1A4Y | 2    | A W375A   | 1.03             |
| 138 | 1A4Y | 2    | A E401A   | 0.86             |
| 139 | 1JRH | 2.8  | L E27A    | 0.54             |
| 140 | 1JRH | 2.8  | L D28A    | 0.43             |
| 141 | 1JRH | 2.8  | L Y30A    | 1.11             |
| 142 | 1JRH | 2.8  | L Y91A    | 0.58             |
| 143 | 1JRH | 2.8  | L W92A    | 2.82             |
| 144 | 1JRH | 2.8  | L S93A    | -0.65            |
| 145 | 1JRH | 2.8  | L T94A    | 0.39             |
| 146 | 1JRH | 2.8  | L W96A    | 1.67             |
| 147 | 1JRH | 2.8  | H Y32A    | 1.43             |
| 148 | 1JRH | 2.8  | H W52A    | 2.69             |
| 149 | 1JRH | 2.8  | H W53A    | 2.42             |
| 150 | 1JRH | 2.8  | H D54A    | 1.89             |
| 151 | 1JRH | 2.8  | H D55A    | 1.67             |
| 152 | 1JRH | 2.8  | H D56A    | 1.85             |
| 153 | 1JRH | 2.8  | H Y58A    | 1.26             |
| 154 | 1JRH | 2.8  | H R95A    | 0.54             |
| 155 | 1JRH | 2.8  | H F98A    | 0.00             |
| 156 | 1JRH | 2.8  | H Y99A    | 1.06             |

**Dataset S1: Curated ZEMu dataset with experimental  $\Delta\Delta G$  values**

| ID  | PDB  | Res. | Mutations            | $\Delta\Delta G$ |
|-----|------|------|----------------------|------------------|
| 157 | 1JRH | 2.8  | H H100bA             | 1.70             |
| 158 | 1JRH | 2.8  | I I57R;I E55P        | -3.44            |
| 159 | 1JRH | 2.8  | I E55G;I S54G;I I57R | -3.38            |
| 160 | 1JRH | 2.8  | I I57L;I E55P        | -3.46            |
| 161 | 1JRH | 2.8  | I E55P;I S54G;I I57K | -3.88            |
| 162 | 1JRH | 2.8  | I E55P               | -3.79            |
| 163 | 1HE8 | 3    | A K223V              | 0.47             |
| 164 | 1HE8 | 3    | A K223V;A R226A      | 1.87             |
| 165 | 1HE8 | 3    | A K234A;A K223V      | 1.50             |
| 166 | 1HE8 | 3    | A K223V;A D238A      | 1.02             |
| 167 | 1HE8 | 3    | A K223V;A K254A      | 1.93             |
| 168 | 1HE8 | 3    | A K256A;A K223V      | 1.65             |
| 169 | 1HE8 | 3    | A K223V;A D260A      | 0.93             |
| 170 | 1HE8 | 3    | A E267K;A K223V      | -0.10            |
| 171 | 1HE8 | 3    | A K223V;A E919A      | 0.45             |
| 172 | 1HE8 | 3    | A K223V;A E919K      | -0.45            |
| 173 | 2PCC | 2.3  | A D34A               | -0.91            |
| 174 | 2PCC | 2.3  | A V197A              | 2.09             |
| 175 | 2PCC | 2.3  | A E290A              | 6.19             |
| 176 | 2PCC | 2.3  | B K87A               | 0.89             |
| 177 | 2PCC | 2.3  | B K87A;A D34A        | 0.20             |
| 178 | 2PCC | 2.3  | A V197A;B K87A       | 1.50             |
| 179 | 2PCC | 2.3  | B K72A               | 0.29             |
| 180 | 2PCC | 2.3  | A V197A;B K72A       | 2.79             |
| 181 | 2PCC | 2.3  | A E290A;B K72A       | 1.09             |
| 182 | 2PCC | 2.3  | B A81G               | 1.90             |



**Dataset S1: Curated ZEMu dataset with experimental  $\Delta\Delta G$  values**

| ID  | PDB  | Res. | Mutations      | $\Delta\Delta G$ |
|-----|------|------|----------------|------------------|
| 183 | 2PCC | 2.3  | A D34A;B A81G  | -0.10            |
| 184 | 2PCC | 2.3  | B A81G;A V197A | 2.10             |
| 185 | 1F47 | 1.95 | A D7S          | 2.06             |
| 186 | 1F47 | 1.95 | A D7G          | 1.14             |
| 187 | 1S1Q | 2    | A V43A         | 0.66             |
| 188 | 1S1Q | 2    | A F44A         | 0.20             |
| 189 | 1S1Q | 2    | A N45A         | 1.21             |
| 190 | 1S1Q | 2    | A D46A         | 0.95             |
| 191 | 1S1Q | 2    | A W75A         | 0.28             |
| 192 | 1S1Q | 2    | A F88A         | 0.76             |
| 193 | 1DQJ | 2    | C W62A         | 0.76             |
| 194 | 1DQJ | 2    | C L75A         | 1.45             |
| 195 | 1DQJ | 2    | C T89A         | 0.84             |
| 196 | 1DQJ | 2    | C N93A         | 0.65             |
| 197 | 1DQJ | 2    | C K96A         | 6.16             |
| 198 | 1DQJ | 2    | C S100A        | 0.78             |
| 199 | 1DQJ | 2    | A N31A         | 2.01             |
| 200 | 1DQJ | 2    | A N32A         | 4.09             |
| 201 | 1DQJ | 2    | A Y50A         | 2.68             |
| 202 | 1DQJ | 2    | A S91A         | 1.43             |
| 203 | 1DQJ | 2    | A Y96A         | 1.14             |
| 204 | 1DQJ | 2    | B D32A         | 2.01             |
| 205 | 1DQJ | 2    | B Y33A         | 5.52             |
| 206 | 1DQJ | 2    | B Y50A         | 6.89             |
| 207 | 1DQJ | 2    | B Y53A         | 1.18             |
| 208 | 1DQJ | 2    | B W98A         | 4.93             |

**Dataset S1: Curated ZEMu dataset with experimental  $\Delta\Delta G$  values**

| ID  | PDB  | Res. | Mutations       | $\Delta\Delta G$ |
|-----|------|------|-----------------|------------------|
| 209 | 1DQJ | 2    | C K96A;A N32A   | 5.80             |
| 210 | 1DQJ | 2    | C R21A;A S91A   | 3.17             |
| 211 | 1DQJ | 2    | A S91A;C Y20A   | 3.57             |
| 212 | 1DQJ | 2    | C R21A;A Y96A   | 3.49             |
| 213 | 1DQJ | 2    | C S100A;A Y96A  | 0.91             |
| 214 | 1DQJ | 2    | C K97A;B D32A   | 2.49             |
| 215 | 1DQJ | 2    | B Y53A;C W62A   | 1.29             |
| 216 | 1DQJ | 2    | C W63A;B Y53A   | 2.20             |
| 217 | 1DQJ | 2    | C L75A;B Y53A   | 1.22             |
| 218 | 1DQJ | 2    | B Y53A;C D101A  | 2.73             |
| 219 | 1DQJ | 2    | C S100A;B W98A  | 5.36             |
| 220 | 1DQJ | 2    | C K97A;B W98A   | 6.66             |
| 221 | 1DQJ | 2    | B W98A;C Y20A   | 5.11             |
| 222 | 1KAC | 2.6  | A P417S         | -0.79            |
| 223 | 1KAC | 2.6  | A S489Y         | -1.25            |
| 226 | 1A4Y | 2    | B R5A           | 2.31             |
| 227 | 1A4Y | 2    | B R32A          | 0.90             |
| 228 | 1A4Y | 2    | B R66A          | 0.20             |
| 229 | 1A4Y | 2    | B R70A          | -0.25            |
| 230 | 1A4Y | 2    | B R31A          | 0.25             |
| 231 | 1A4Y | 2    | B R33A          | 0.33             |
| 232 | 1REW | 1.86 | B W28F;A W28F   | 0.67             |
| 233 | 1REW | 1.86 | A D53P;B D53P   | 2.35             |
| 234 | 1REW | 1.86 | B S69R;A S69R   | 1.67             |
| 235 | 1REW | 1.86 | B Y103A;A Y103A | 1.21             |
| 236 | 1REW | 1.86 | C Q86A          | 2.66             |

**Dataset S1: Curated ZEMu dataset with experimental  $\Delta\Delta G$  values**

| ID  | PDB  | Res. | Mutations                   | $\Delta\Delta G$ |
|-----|------|------|-----------------------------|------------------|
| 237 | 1LFD | 2.1  | A R20A                      | 1.10             |
| 238 | 1LFD | 2.1  | A S22K                      | -0.10            |
| 239 | 1LFD | 2.1  | A L23K                      | 0.00             |
| 240 | 1LFD | 2.1  | A N27K                      | 0.40             |
| 241 | 1LFD | 2.1  | A M30K                      | -0.90            |
| 242 | 1LFD | 2.1  | A K32A                      | 1.30             |
| 243 | 1LFD | 2.1  | A K48A                      | 0.20             |
| 244 | 1LFD | 2.1  | A D51A                      | -0.60            |
| 245 | 1LFD | 2.1  | A D51K                      | -1.10            |
| 246 | 1LFD | 2.1  | A K52A                      | 1.20             |
| 247 | 1LFD | 2.1  | A N54K                      | -0.90            |
| 248 | 1LFD | 2.1  | A L55K                      | -0.60            |
| 249 | 1LFD | 2.1  | A D56A                      | -0.30            |
| 250 | 1LFD | 2.1  | A E57A                      | -0.20            |
| 251 | 1LFD | 2.1  | A E57K                      | -0.30            |
| 252 | 1LFD | 2.1  | A D58K                      | -0.90            |
| 253 | 1LFD | 2.1  | A N92K                      | -0.60            |
| 254 | 1LFD | 2.1  | A Y93K                      | 0.10             |
| 255 | 1LFD | 2.1  | A D94K                      | -1.10            |
| 256 | 1LFD | 2.1  | A M30K;A D58K               | -1.00            |
| 257 | 1LFD | 2.1  | A D94K;A M30K               | -0.90            |
| 258 | 1LFD | 2.1  | A D58K;A D51K;A M30K        | -2.00            |
| 259 | 1LFD | 2.1  | A D58K;A M30K;A D51K;A D94K | -1.70            |
| 260 | 1LFD | 2.1  | A D51K;A E57K;A D56K        | -1.60            |
| 261 | 1LFD | 2.1  | A D58K;A D94K               | -0.60            |
| 262 | 1TM1 | 1.7  | I M59G                      | 2.23             |

**Dataset S1: Curated ZEMu dataset with experimental  $\Delta\Delta G$  values**

| ID  | PDB  | Res. | Mutations                      | $\Delta\Delta G$ |
|-----|------|------|--------------------------------|------------------|
| 263 | 1TM1 | 1.7  | I M59A                         | 1.03             |
| 264 | 1TM1 | 1.7  | I M59K                         | 1.09             |
| 265 | 1TM1 | 1.7  | I M59Y                         | 0.06             |
| 266 | 1TM1 | 1.7  | I M59F                         | 1.03             |
| 267 | 1JTG | 1.73 | B K74A                         | 3.56             |
| 268 | 1JTG | 1.73 | B F142A                        | 2.10             |
| 269 | 1JTG | 1.73 | B Y143A                        | 0.38             |
| 270 | 1JTG | 1.73 | B F142A;B K74A                 | 4.85             |
| 271 | 1JTG | 1.73 | B Y143A;B K74A                 | 3.06             |
| 272 | 1JTG | 1.73 | B Y143A;B F142A                | 2.84             |
| 273 | 1JTG | 1.73 | B F142A;B Y143A;B K74A         | 3.89             |
| 274 | 1JTG | 1.73 | A E104A                        | 1.55             |
| 275 | 1JTG | 1.73 | B K74A;A E104A                 | 1.58             |
| 276 | 1JTG | 1.73 | B F142A;A E104A                | 2.75             |
| 277 | 1JTG | 1.73 | A E104A;B Y143A                | 1.86             |
| 278 | 1JTG | 1.73 | B F142A;A E104A;B K74A         | 3.13             |
| 279 | 1JTG | 1.73 | B Y143A;B K74A;A E104A         | 1.05             |
| 280 | 1JTG | 1.73 | B Y143A;B F142A;A E104A        | 2.89             |
| 281 | 1JTG | 1.73 | B Y143A;A E104A;B K74A;B F142A | 2.39             |
| 282 | 1JTG | 1.73 | A Y105A                        | -0.17            |
| 283 | 1JTG | 1.73 | B K74A;A Y105A                 | 3.32             |
| 284 | 1JTG | 1.73 | B F142A;A Y105A                | 0.69             |
| 285 | 1JTG | 1.73 | B Y143A;A Y105A                | 1.07             |
| 286 | 1JTG | 1.73 | A Y105A;B K74A;B F142A         | 4.78             |
| 287 | 1JTG | 1.73 | B K74A;A Y105A;B Y143A         | 3.39             |
| 288 | 1JTG | 1.73 | B F142A;A Y105A;B Y143A        | 2.99             |

**Dataset S1: Curated ZEMu dataset with experimental  $\Delta\Delta G$  values**

| ID  | PDB  | Res. | Mutations                              | $\Delta\Delta G$ |
|-----|------|------|----------------------------------------|------------------|
| 289 | 1JTG | 1.73 | A Y105A;B K74A;B F142A;B Y143A         | 4.23             |
| 290 | 1JTG | 1.73 | A E104A;A Y105A                        | 1.03             |
| 291 | 1JTG | 1.73 | A E104A;B K74A;A Y105A                 | 1.39             |
| 292 | 1JTG | 1.73 | B F142A;A Y105A;A E104A                | 1.50             |
| 293 | 1JTG | 1.73 | A Y105A;A E104A;B Y143A                | 2.05             |
| 294 | 1JTG | 1.73 | A Y105A;B K74A;A E104A;B F142A         | 3.13             |
| 295 | 1JTG | 1.73 | B K74A;A Y105A;B Y143A;A E104A         | 1.77             |
| 296 | 1JTG | 1.73 | B F142A;A Y105A;B Y143A;A E104A        | 2.84             |
| 297 | 1JTG | 1.73 | B F142A;B Y143A;A Y105A;B K74A;A E104A | 2.41             |
| 298 | 1JTG | 1.73 | B K74A;A R243A                         | 6.62             |
| 299 | 1JTG | 1.73 | A R243A;B F142A                        | 3.39             |
| 300 | 1JTG | 1.73 | B Y143A;A R243A                        | 2.27             |
| 301 | 1JTG | 1.73 | B K74A;B F142A;A R243A                 | 5.49             |
| 302 | 1JTG | 1.73 | B K74A;A R243A;B Y143A                 | 4.37             |
| 303 | 1JTG | 1.73 | B K74A;A K234A                         | 6.55             |
| 304 | 1JTG | 1.73 | A K234A;B K74A;B F142A                 | 5.83             |
| 305 | 1JTG | 1.73 | B Y143A;B K74A;A K234A                 | 4.87             |
| 306 | 1JTG | 1.73 | B Y143A;A K234A;B K74A;B F142A         | 5.47             |
| 307 | 1JTG | 1.73 | B Y143A;A S130A;B K74A;B F142A         | 5.06             |
| 308 | 1TM1 | 1.7  | I T58A                                 | 2.57             |
| 309 | 1TM1 | 1.7  | I T58P                                 | 3.75             |
| 310 | 1TM1 | 1.7  | I E60A                                 | 2.92             |
| 311 | 1TM1 | 1.7  | I E60S                                 | 2.75             |
| 312 | 1TM1 | 1.7  | I M59R;I E60S                          | 3.55             |
| 313 | 1TM1 | 1.7  | I R62A                                 | 1.26             |
| 314 | 2A9K | 1.73 | B G99D                                 | 2.41             |

**Dataset S1: Curated ZEMu dataset with experimental  $\Delta\Delta G$  values**

| ID  | PDB  | Res. | Mutations | $\Delta\Delta G$ |
|-----|------|------|-----------|------------------|
| 315 | 2B42 | 2.5  | A H374A   | 1.58             |
| 316 | 2B42 | 2.5  | A H374Q   | 0.98             |
| 317 | 2B42 | 2.5  | A H374K   | 2.54             |
| 318 | 1KTZ | 2.15 | B L27A    | 1.82             |
| 319 | 1KTZ | 2.15 | B F30A    | 2.98             |
| 320 | 1KTZ | 2.15 | B D32A    | 1.52             |
| 321 | 1KTZ | 2.15 | B D32N    | 2.00             |
| 322 | 1KTZ | 2.15 | B S49A    | 0.33             |
| 323 | 1KTZ | 2.15 | B I50A    | 1.90             |
| 324 | 1KTZ | 2.15 | B T51A    | 1.51             |
| 325 | 1KTZ | 2.15 | B S52A    | 0.22             |
| 326 | 1KTZ | 2.15 | B S52L    | 4.04             |
| 327 | 1KTZ | 2.15 | B I53A    | 1.37             |
| 328 | 1KTZ | 2.15 | B E55A    | 1.22             |
| 329 | 1KTZ | 2.15 | B V77A    | 0.41             |
| 330 | 1KTZ | 2.15 | B D118A   | 0.81             |
| 331 | 1KTZ | 2.15 | B E119A   | 1.49             |
| 332 | 1KTZ | 2.15 | B E119Q   | 1.63             |
| 333 | 1KTZ | 2.15 | B N47A    | 0.28             |
| 334 | 1KTZ | 2.15 | B V62A    | 0.65             |
| 335 | 1KTZ | 2.15 | B E75A    | 1.08             |
| 336 | 1KTZ | 2.15 | B H79A    | 0.30             |
| 337 | 1KTZ | 2.15 | B F110A   | 0.93             |
| 338 | 1KTZ | 2.15 | B M112A   | 0.87             |
| 339 | 1KTZ | 2.15 | B I125A   | 0.54             |
| 340 | 2I26 | 2.5  | N A30V    | 0.07             |

**Dataset S1: Curated ZEMu dataset with experimental  $\Delta\Delta G$  values**

| ID  | PDB  | Res. | Mutations      | $\Delta\Delta G$ |
|-----|------|------|----------------|------------------|
| 341 | 2I26 | 2.5  | N S61R         | -0.62            |
| 342 | 2J12 | 1.5  | A S299A        | 0.95             |
| 343 | 2J1K | 2.3  | C R515A        | 0.05             |
| 344 | 2J1K | 2.3  | C G370D        | 0.18             |
| 345 | 2J1K | 2.3  | C R384A        | 0.76             |
| 346 | 1JTG | 1.73 | A Q99A         | 0.43             |
| 347 | 1JTG | 1.73 | A N100A        | -0.45            |
| 348 | 1JTG | 1.73 | A V103A        | 1.91             |
| 349 | 1JTG | 1.73 | A P107A        | -0.38            |
| 350 | 1JTG | 1.73 | A E110A        | 4.06             |
| 351 | 1JTG | 1.73 | A M129A        | 0.74             |
| 352 | 1JTG | 1.73 | A E168A        | -0.07            |
| 353 | 1JTG | 1.73 | A V216A        | -0.41            |
| 354 | 1JTG | 1.73 | B F36A         | 3.20             |
| 355 | 1JTG | 1.73 | B H41A         | 3.25             |
| 356 | 1JTG | 1.73 | B Y53A         | 2.08             |
| 357 | 1JTG | 1.73 | B S71A         | 0.36             |
| 358 | 1JTG | 1.73 | B W112A        | 3.01             |
| 359 | 1JTG | 1.73 | B S113A        | -0.17            |
| 360 | 1JTG | 1.73 | B H148A        | 2.75             |
| 361 | 1JTG | 1.73 | B W150A        | 4.25             |
| 362 | 1JTG | 1.73 | B R160A        | 2.22             |
| 363 | 1JTG | 1.73 | B W162A        | 2.34             |
| 364 | 1JTG | 1.73 | B H148A;A Q99A | 3.20             |
| 365 | 1JTG | 1.73 | B W150A;A Q99A | 3.82             |
| 366 | 1JTG | 1.73 | A Q99A;B R160A | 3.75             |

**Dataset S1: Curated ZEMu dataset with experimental  $\Delta\Delta G$  values**

| ID  | PDB  | Res. | Mutations              | $\Delta\Delta G$ |
|-----|------|------|------------------------|------------------|
| 367 | 1JTG | 1.73 | B H148A;A N100A        | 2.10             |
| 368 | 1JTG | 1.73 | B W150A;A N100A        | 4.35             |
| 369 | 1JTG | 1.73 | B R160A;A N100A        | 1.58             |
| 370 | 1JTG | 1.73 | A E168A;B W162A        | 2.08             |
| 371 | 1JTG | 1.73 | A V103A;B W162A        | 4.23             |
| 372 | 1JTG | 1.73 | B Y53A;A M129A         | 3.61             |
| 373 | 1JTG | 1.73 | B F36A;A M129A         | 3.63             |
| 374 | 1JTG | 1.73 | B H41A;A P107A         | 2.65             |
| 375 | 1JTG | 1.73 | A P107A;B Y53A         | 2.39             |
| 376 | 1JTG | 1.73 | B S113A;A E110A;B S71A | 5.04             |
| 377 | 1JTG | 1.73 | A E110A;B S113A        | 4.57             |
| 378 | 1JTG | 1.73 | B S71A;A E110A         | 5.02             |
| 379 | 1JTG | 1.73 | A E104A;B S113A        | 1.86             |
| 380 | 1JTG | 1.73 | A Q99A;B W112A         | 3.54             |
| 381 | 1JTG | 1.73 | B W162A;A Q99A         | 2.89             |
| 382 | 1JTG | 1.73 | B K74A;A Q99A          | 4.11             |
| 383 | 1JTG | 1.73 | A Q99A;B F142A         | 2.82             |
| 384 | 1JTG | 1.73 | B W112A;A N100A        | 2.80             |
| 385 | 1JTG | 1.73 | A N100A;B W162A        | 2.10             |
| 386 | 1JTG | 1.73 | B K74A;A N100A         | 3.51             |
| 387 | 1JTG | 1.73 | A N100A;B F142A        | 2.29             |
| 388 | 1JTG | 1.73 | B R160A;A V103A        | 4.35             |
| 389 | 1JTG | 1.73 | B F142A;A V103A        | 4.52             |
| 390 | 1JTG | 1.73 | B W112A;A E168A        | 2.80             |
| 391 | 1JTG | 1.73 | B W150A;A E168A        | 4.11             |
| 392 | 1JTG | 1.73 | B R160A;A E168A        | 2.32             |



**Dataset S1: Curated ZEMu dataset with experimental  $\Delta\Delta G$  values**

| ID  | PDB  | Res. | Mutations              | $\Delta\Delta G$ |
|-----|------|------|------------------------|------------------|
| 393 | 1JTG | 1.73 | B K74A;A E168A         | 4.06             |
| 394 | 1JTG | 1.73 | A E168A;B F142A        | 2.58             |
| 395 | 1JTG | 1.73 | B Y50A;A E110A         | 3.97             |
| 396 | 1JTG | 1.73 | B S113A;A M129A;B S71A | 1.67             |
| 397 | 2JEL | 2.5  | P F2Y                  | 0.00             |
| 398 | 2JEL | 2.5  | P F2W                  | 2.62             |
| 399 | 2JEL | 2.5  | P Q3K                  | 4.09             |
| 400 | 2JEL | 2.5  | P Q4K                  | 1.36             |
| 401 | 2JEL | 2.5  | P E5D                  | 0.41             |
| 402 | 2JEL | 2.5  | P E5Q                  | 0.71             |
| 403 | 2JEL | 2.5  | P V6F                  | 0.00             |
| 404 | 2JEL | 2.5  | P T7N                  | 0.41             |
| 405 | 2JEL | 2.5  | P T7S                  | 0.00             |
| 406 | 2JEL | 2.5  | P P11E                 | 0.00             |
| 407 | 2JEL | 2.5  | P N12D                 | 0.00             |
| 408 | 2JEL | 2.5  | P R17G                 | 0.00             |
| 409 | 2JEL | 2.5  | P R17K                 | 0.00             |
| 410 | 2JEL | 2.5  | P K24E                 | 0.00             |
| 411 | 2JEL | 2.5  | P K27E                 | 0.00             |
| 412 | 2JEL | 2.5  | P T34Q                 | 0.00             |
| 413 | 2JEL | 2.5  | P T36Q                 | 0.41             |
| 414 | 2JEL | 2.5  | P N38T                 | 0.00             |
| 415 | 2JEL | 2.5  | P S41C                 | 1.50             |
| 416 | 2JEL | 2.5  | P S43C                 | 0.00             |
| 417 | 2JEL | 2.5  | P S46C                 | 0.00             |
| 418 | 2JEL | 2.5  | P Q57E                 | -0.41            |

**Dataset S1: Curated ZEMu dataset with experimental  $\Delta\Delta G$  values**

| ID  | PDB  | Res. | Mutations | $\Delta\Delta G$ |
|-----|------|------|-----------|------------------|
| 419 | 2JEL | 2.5  | P T62N    | 0.00             |
| 420 | 2JEL | 2.5  | P T62A    | 0.00             |
| 421 | 2JEL | 2.5  | P S64T    | 4.09             |
| 422 | 2JEL | 2.5  | P E66K    | 4.09             |
| 423 | 2JEL | 2.5  | P E68A    | 0.41             |
| 424 | 2JEL | 2.5  | P D69E    | 0.95             |
| 425 | 2JEL | 2.5  | P E70K    | 4.09             |
| 426 | 2JEL | 2.5  | P E70A    | 2.73             |
| 427 | 2JEL | 2.5  | P Q71E    | 2.73             |
| 428 | 2JEL | 2.5  | P K72R    | 0.00             |
| 429 | 2JEL | 2.5  | P K72E    | 0.41             |
| 430 | 2JEL | 2.5  | P E75R    | 2.73             |
| 431 | 2JEL | 2.5  | P H76D    | -0.65            |
| 432 | 2JEL | 2.5  | P H76A    | -0.41            |
| 433 | 2JEL | 2.5  | P K79E    | 0.41             |
| 434 | 2JEL | 2.5  | P A82S    | 0.00             |
| 435 | 2JEL | 2.5  | P E83A    | 0.00             |
| 436 | 2JEL | 2.5  | P E85Q    | 0.00             |
| 437 | 2JEL | 2.5  | P E85D    | 0.00             |
| 438 | 2JEL | 2.5  | P E85A    | 0.00             |
| 439 | 2JEL | 2.5  | P E85K    | 0.00             |
| 440 | 1UUZ | 1.8  | A H62Q    | 1.52             |
| 441 | 1UUZ | 1.8  | A H62N    | 1.52             |
| 442 | 1UUZ | 1.8  | A H62D    | 3.38             |
| 443 | 1UUZ | 1.8  | A H62A    | 1.77             |
| 444 | 1UUZ | 1.8  | A C64A    | 0.65             |

**Dataset S1: Curated ZEMu dataset with experimental  $\Delta\Delta G$  values**

| ID  | PDB  | Res. | Mutations | $\Delta\Delta G$ |
|-----|------|------|-----------|------------------|
| 445 | 1EAW | 2.93 | A Q38A    | -0.52            |
| 446 | 1EAW | 2.93 | A I41A    | -0.82            |
| 447 | 1EAW | 2.93 | A I60A    | -0.19            |
| 448 | 1EAW | 2.93 | A D60aA   | -0.17            |
| 449 | 1EAW | 2.93 | A D60bA   | 1.50             |
| 450 | 1EAW | 2.93 | A R60cA   | 0.59             |
| 451 | 1EAW | 2.93 | A F60eA   | -0.43            |
| 452 | 1EAW | 2.93 | A R60fA   | 0.23             |
| 453 | 1EAW | 2.93 | A Y60gA   | -0.08            |
| 454 | 1EAW | 2.93 | A R87A    | -0.15            |
| 455 | 1EAW | 2.93 | A F94A    | 0.73             |
| 456 | 1EAW | 2.93 | A N95A    | 0.31             |
| 457 | 1EAW | 2.93 | A D96A    | 0.65             |
| 458 | 1EAW | 2.93 | A F97A    | 0.89             |
| 459 | 1EAW | 2.93 | A T98A    | 0.25             |
| 460 | 1EAW | 2.93 | A H143A   | -0.01            |
| 461 | 1EAW | 2.93 | A Q145A   | 0.31             |
| 462 | 1EAW | 2.93 | A Y146A   | 0.50             |
| 463 | 1EAW | 2.93 | A T150A   | 0.09             |
| 464 | 1EAW | 2.93 | A L153A   | 0.50             |
| 465 | 1EAW | 2.93 | A E169A   | 0.70             |
| 466 | 1EAW | 2.93 | A Q174A   | 0.56             |
| 467 | 1EAW | 2.93 | A Q175A   | -0.13            |
| 468 | 1EAW | 2.93 | A D217A   | 2.23             |
| 469 | 1EAW | 2.93 | A Q221aA  | 0.14             |
| 470 | 1EAW | 2.93 | A R222A   | -0.09            |

**Dataset S1: Curated ZEMu dataset with experimental  $\Delta\Delta G$  values**

| ID  | PDB  | Res. | Mutations | $\Delta\Delta G$ |
|-----|------|------|-----------|------------------|
| 471 | 1EAW | 2.93 | A K224A   | 0.48             |
| 472 | 3BN9 | 2.17 | B Q38A    | -0.42            |
| 473 | 3BN9 | 2.17 | B I41A    | 0.00             |
| 474 | 3BN9 | 2.17 | B I60A    | 0.84             |
| 475 | 3BN9 | 2.17 | B D60aA   | 0.42             |
| 476 | 3BN9 | 2.17 | B D60bA   | 0.31             |
| 477 | 3BN9 | 2.17 | B R60cA   | -0.04            |
| 478 | 3BN9 | 2.17 | B F60eA   | -0.04            |
| 479 | 3BN9 | 2.17 | B R60fA   | -0.07            |
| 480 | 3BN9 | 2.17 | B Y60gA   | 0.02             |
| 481 | 3BN9 | 2.17 | B R87A    | -0.16            |
| 482 | 3BN9 | 2.17 | B F94A    | 0.64             |
| 483 | 3BN9 | 2.17 | B N95A    | 0.77             |
| 484 | 3BN9 | 2.17 | B T98A    | 1.13             |
| 485 | 3BN9 | 2.17 | B H143A   | 0.09             |
| 486 | 3BN9 | 2.17 | B Q145A   | 0.13             |
| 487 | 3BN9 | 2.17 | B Y146A   | 1.08             |
| 488 | 3BN9 | 2.17 | B T150A   | 0.29             |
| 489 | 3BN9 | 2.17 | B L153A   | 0.34             |
| 490 | 3BN9 | 2.17 | B E169A   | 0.37             |
| 491 | 3BN9 | 2.17 | B Q174A   | -0.03            |
| 492 | 3BN9 | 2.17 | B Q175A   | 2.51             |
| 493 | 3BN9 | 2.17 | B D217A   | 0.57             |
| 494 | 3BN9 | 2.17 | B Q221aA  | 0.71             |
| 495 | 3BN9 | 2.17 | B R222A   | -0.09            |
| 496 | 3BN9 | 2.17 | B K224A   | 0.78             |

**Dataset S1: Curated ZEMu dataset with experimental  $\Delta\Delta G$  values**

| ID  | PDB  | Res. | Mutations | $\Delta\Delta G$ |
|-----|------|------|-----------|------------------|
| 497 | 3NPS | 1.5  | A Q38A    | 0.03             |
| 498 | 3NPS | 1.5  | A I41A    | 0.64             |
| 499 | 3NPS | 1.5  | A I60A    | -0.33            |
| 500 | 3NPS | 1.5  | A D60aA   | 0.34             |
| 501 | 3NPS | 1.5  | A D60bA   | 1.07             |
| 502 | 3NPS | 1.5  | A R60cA   | -1.06            |
| 503 | 3NPS | 1.5  | A F60eA   | 0.22             |
| 504 | 3NPS | 1.5  | A R60fA   | 0.14             |
| 505 | 3NPS | 1.5  | A Y60gA   | 0.45             |
| 506 | 3NPS | 1.5  | A R87A    | -0.15            |
| 507 | 3NPS | 1.5  | A F94A    | 1.59             |
| 508 | 3NPS | 1.5  | A N95A    | 0.25             |
| 509 | 3NPS | 1.5  | A D96A    | 1.51             |
| 510 | 3NPS | 1.5  | A F97A    | 0.46             |
| 511 | 3NPS | 1.5  | A T98A    | 0.72             |
| 512 | 3NPS | 1.5  | A H143A   | 1.88             |
| 513 | 3NPS | 1.5  | A Q145A   | 0.30             |
| 514 | 3NPS | 1.5  | A Y146A   | 1.77             |
| 515 | 3NPS | 1.5  | A T150A   | 0.17             |
| 516 | 3NPS | 1.5  | A L153A   | 0.30             |
| 517 | 3NPS | 1.5  | A E169A   | 0.62             |
| 518 | 3NPS | 1.5  | A Q174A   | -0.06            |
| 519 | 3NPS | 1.5  | A Q175A   | 0.74             |
| 520 | 3NPS | 1.5  | A D217A   | 1.47             |
| 521 | 3NPS | 1.5  | A Q221aA  | -0.04            |
| 522 | 3NPS | 1.5  | A R222A   | -0.08            |

**Dataset S1: Curated ZEMu dataset with experimental  $\Delta\Delta G$  values**

| ID  | PDB  | Res. | Mutations                                                                                                | $\Delta\Delta G$ |
|-----|------|------|----------------------------------------------------------------------------------------------------------|------------------|
| 523 | 3NPS | 1.5  | A K224A                                                                                                  | -0.10            |
| 524 | 1REW | 1.86 | C Q94H;C K88R;C T98D;C L95Q;C A93P;C S90T;C K92I                                                         | 0.73             |
| 525 | 2QJ9 | 2.44 | C S98T;C P93A;C R88K;C I92K;C T90S;C Q95L;C H94Q                                                         | -0.73            |
| 526 | 1REW | 1.86 | C T98D;C M78L;C K88R;C A74T;C S90T;C L95Q;C K79G;C Y80L;C Q94H;C K92I;C A93P                             | 0.27             |
| 527 | 2QJ9 | 2.44 | C K79G;C Y80L;C A74T;C M78L                                                                              | -0.46            |
| 528 | 2QJA | 2.6  | C L78M;C T74A;C G79K;C L80Y                                                                              | 0.46             |
| 529 | 2QJA | 2.6  | C T74A;C Q95L;C L78M;C G79K;C S98T;C P93A;C I92K;C T90S;C R88K;C L80Y;C H94Q                             | -0.27            |
| 530 | 2QJ9 | 2.44 | C K79G;C D46E;C Y80L;C I62M;C A74T;C M78L;C G42H;C A61T                                                  | 0.36             |
| 531 | 2QJA | 2.6  | C D46E;C I62M;C A61T;C G42H                                                                              | 0.81             |
| 532 | 2QJB | 2.5  | C M62I;C H42G;C T61A;C E46D                                                                              | -0.81            |
| 533 | 2QJB | 2.5  | C T74A;C L80Y;C G79K;C T61A;C L78M;C E46D;C M62I;C H42G                                                  | -0.36            |
| 534 | 2QJB | 2.5  | C L78M;C H42G;C T74A;C R88K;C M62I;C I92K;C G79K;C T61A;C Q95L;C L80Y;C H94Q;C E46D;C T90S;C S98T;C P93A | -1.09            |
| 535 | 2VLR | 2.3  | E A99S                                                                                                   | 0.00             |
| 536 | 2VLJ | 2.4  | E D32A                                                                                                   | 1.57             |
| 537 | 2VLJ | 2.4  | E I53V                                                                                                   | 0.20             |
| 538 | 2VLJ | 2.4  | E I53L                                                                                                   | 1.42             |
| 539 | 2VLJ | 2.4  | E N55A                                                                                                   | 1.10             |
| 540 | 2VLJ | 2.4  | E N55D                                                                                                   | 0.50             |

**Dataset S1: Curated ZEMu dataset with experimental  $\Delta\Delta G$  values**

| ID  | PDB  | Res. | Mutations     | $\Delta\Delta G$ |
|-----|------|------|---------------|------------------|
| 541 | 2VLJ | 2.4  | E D56A        | 0.10             |
| 542 | 2VLJ | 2.4  | E Q58A        | 0.50             |
| 543 | 2VLJ | 2.4  | E Q58E        | 0.00             |
| 544 | 2VLJ | 2.4  | E S99A        | 0.00             |
| 545 | 2VLJ | 2.4  | E Y101A       | 0.20             |
| 546 | 2VLJ | 2.4  | E Y101F       | 0.50             |
| 547 | 2VLJ | 2.4  | D S31A        | 0.63             |
| 548 | 2VLJ | 2.4  | D S32A        | 1.00             |
| 549 | 2VLJ | 2.4  | D Q34A        | 1.00             |
| 550 | 2WPT | 1.78 | B F86A;A D33A | -0.30            |
| 551 | 2WPT | 1.78 | B F86A;A N34A | 1.20             |
| 552 | 2WPT | 1.78 | A V37A;B F86A | 2.90             |
| 553 | 2WPT | 1.78 | B R54A        | 1.10             |
| 554 | 2WPT | 1.78 | B N72A        | 0.90             |
| 555 | 2WPT | 1.78 | B S74A        | -0.90            |
| 556 | 2WPT | 1.78 | B N75A        | 1.20             |
| 557 | 2WPT | 1.78 | B S77A        | -0.60            |
| 558 | 2WPT | 1.78 | B S78A        | -0.20            |
| 559 | 2WPT | 1.78 | B S84A        | -0.10            |
| 560 | 2WPT | 1.78 | B F86A        | 1.20             |
| 561 | 2WPT | 1.78 | B T87A        | 0.50             |
| 562 | 2WPT | 1.78 | B Q92A        | -0.50            |
| 563 | 2WPT | 1.78 | B K97A        | 0.50             |
| 564 | 2WPT | 1.78 | B V98A        | 0.10             |
| 569 | 1EMV | 1.7  | B R54A        | 1.70             |
| 570 | 1EMV | 1.7  | B N72A        | 1.10             |

**Dataset S1: Curated ZEMu dataset with experimental  $\Delta\Delta G$  values**

| ID  | PDB  | Res. | Mutations     | $\Delta\Delta G$ |
|-----|------|------|---------------|------------------|
| 571 | 1EMV | 1.7  | B S74A        | -0.20            |
| 572 | 1EMV | 1.7  | B N75A        | 2.30             |
| 573 | 1EMV | 1.7  | B S77A        | -0.20            |
| 574 | 1EMV | 1.7  | B S78A        | -0.50            |
| 575 | 1EMV | 1.7  | B S84A        | -0.10            |
| 576 | 1EMV | 1.7  | B F86A        | 3.90             |
| 577 | 1EMV | 1.7  | B T87A        | 0.20             |
| 578 | 1EMV | 1.7  | B Q92A        | -0.30            |
| 579 | 1EMV | 1.7  | B K97A        | 2.00             |
| 580 | 1EMV | 1.7  | B V98A        | 1.10             |
| 581 | 1EMV | 1.7  | B F86A;A L33A | 6.90             |
| 582 | 1EMV | 1.7  | A V34A;B F86A | 4.80             |
| 583 | 1EMV | 1.7  | B F86A;A V37A | 4.30             |
| 584 | 1EMV | 1.7  | B F86A;A Y54A | 8.90             |
| 585 | 1EMV | 1.7  | A Y55A;B F86A | 8.40             |
| 586 | 3BK3 | 2.7  | C L1A         | 0.04             |
| 587 | 3BK3 | 2.7  | C L1R         | 0.08             |
| 588 | 3BK3 | 2.7  | C I2A         | 1.04             |
| 589 | 3BK3 | 2.7  | C I2R         | 0.65             |
| 590 | 3BK3 | 2.7  | C T3P         | 0.54             |
| 591 | 3BK3 | 2.7  | C T5P         | 1.79             |
| 592 | 3BK3 | 2.7  | C I18A        | 0.54             |
| 593 | 3BK3 | 2.7  | C I18R        | 0.47             |
| 594 | 3BK3 | 2.7  | C I21A        | 1.31             |
| 595 | 3BK3 | 2.7  | C I21R        | 2.12             |
| 596 | 3BK3 | 2.7  | C I27A        | 1.26             |



**Dataset S1: Curated ZEMu dataset with experimental  $\Delta\Delta G$  values**

| ID  | PDB  | Res. | Mutations                               | $\Delta\Delta G$ |
|-----|------|------|-----------------------------------------|------------------|
| 597 | 3BK3 | 2.7  | C I27R                                  | 1.17             |
| 598 | 3BK3 | 2.7  | C A36R                                  | 1.38             |
| 599 | 2OOB | 1.9  | A K935E                                 | -0.18            |
| 600 | 2OOB | 1.9  | A A934S;A K935E                         | 0.16             |
| 601 | 2OOB | 1.9  | A G941S                                 | 0.24             |
| 602 | 2OOB | 1.9  | A I955E;A I966E                         | 0.28             |
| 603 | 1KTZ | 2.15 | A V92I                                  | 0.22             |
| 604 | 1KTZ | 2.15 | A R25K                                  | 1.12             |
| 605 | 1KTZ | 2.15 | A R94K                                  | 2.20             |
| 606 | 1KTZ | 2.15 | A R25A                                  | 1.48             |
| 607 | 1KTZ | 2.15 | A R94A                                  | 2.88             |
| 608 | 1A22 | 2.6  | B F296S                                 | 0.05             |
| 609 | 1A22 | 2.6  | B K234A;B K237A                         | 0.24             |
| 610 | 1A22 | 2.6  | B E275A;B R271A;B R270A                 | 0.96             |
| 611 | 1A22 | 2.6  | B D319A;B K321A;B E320A                 | 0.21             |
| 612 | 1A22 | 2.6  | B D352A;B R356A;B E358A                 | 0.31             |
| 613 | 1A22 | 2.6  | B K367A;B D364A;B R361A                 | -0.06            |
| 614 | 1A22 | 2.6  | B E383A;B K387A;B D390A;B K385A         | 0.12             |
| 615 | 1A22 | 2.6  | B D405A;B E409A;B K406A;B E407A;B K403A | 1.12             |
| 616 | 1A22 | 2.6  | B R239A                                 | 0.27             |
| 617 | 1A22 | 2.6  | B E242A                                 | 1.23             |
| 618 | 1A22 | 2.6  | B R243A                                 | 2.12             |
| 619 | 1A22 | 2.6  | B E244A                                 | 0.65             |
| 620 | 1A22 | 2.6  | B R270A                                 | 0.69             |
| 621 | 1A22 | 2.6  | B R271A                                 | 0.60             |
| 622 | 1A22 | 2.6  | B E275A                                 | -0.09            |

**Dataset S1: Curated ZEMu dataset with experimental  $\Delta\Delta G$  values**

| ID  | PDB  | Res. | Mutations | $\Delta\Delta G$ |
|-----|------|------|-----------|------------------|
| 623 | 1A22 | 2.6  | B E279A   | -0.08            |
| 624 | 1A22 | 2.6  | B K281A   | 0.14             |
| 625 | 1A22 | 2.6  | B E282A   | 0.78             |
| 626 | 1A22 | 2.6  | B E291A   | 0.18             |
| 627 | 1A22 | 2.6  | B K310A   | 0.04             |
| 628 | 1A22 | 2.6  | B D326A   | 0.98             |
| 629 | 1A22 | 2.6  | B E327A   | 0.41             |
| 630 | 1A22 | 2.6  | B D332A   | 1.09             |
| 631 | 1A22 | 2.6  | B E373A   | 0.08             |
| 632 | 1A22 | 2.6  | B E375A   | -0.08            |
| 633 | 1A22 | 2.6  | B K379A   | 0.00             |
| 634 | 1A22 | 2.6  | B E380A   | 0.20             |
| 635 | 1A22 | 2.6  | B K403A   | 0.24             |
| 636 | 1A22 | 2.6  | B D405A   | -0.05            |
| 637 | 1A22 | 2.6  | B K406A   | 0.20             |
| 638 | 1A22 | 2.6  | B E407A   | -0.08            |
| 639 | 1A22 | 2.6  | B E409A   | -0.06            |
| 640 | 1A22 | 2.6  | B R411A   | 0.06             |
| 641 | 1A22 | 2.6  | B R413A   | -0.19            |
| 642 | 1A22 | 2.6  | B K415A   | 0.50             |
| 643 | 1A22 | 2.6  | B R417A   | 0.20             |
| 644 | 1A22 | 2.6  | B E424A   | 0.11             |
| 645 | 1A22 | 2.6  | B W276A   | 0.56             |
| 646 | 1A22 | 2.6  | B W280A   | -0.02            |
| 647 | 1A22 | 2.6  | B W304F   | 2.78             |
| 648 | 1A22 | 2.6  | B Y295A   | 0.20             |

**Dataset S1: Curated ZEMu dataset with experimental  $\Delta\Delta G$  values**

| ID  | PDB  | Res. | Mutations | $\Delta\Delta G$ |
|-----|------|------|-----------|------------------|
| 649 | 1A22 | 2.6  | B P241A   | 0.26             |
| 650 | 1A22 | 2.6  | B S247A   | -0.01            |
| 651 | 1A22 | 2.6  | B T251A   | 0.07             |
| 652 | 1A22 | 2.6  | B N272A   | 0.27             |
| 653 | 1A22 | 2.6  | B T273A   | -0.44            |
| 654 | 1A22 | 2.6  | B Q274A   | 0.00             |
| 655 | 1A22 | 2.6  | B T277A   | 0.20             |
| 656 | 1A22 | 2.6  | B Q278A   | -0.41            |
| 657 | 1A22 | 2.6  | B N297A   | -0.26            |
| 658 | 1A22 | 2.6  | B S298A   | -0.33            |
| 659 | 1A22 | 2.6  | B S299A   | -0.51            |
| 660 | 1A22 | 2.6  | B F300A   | -0.01            |
| 661 | 1A22 | 2.6  | B T301A   | 1.09             |
| 662 | 1A22 | 2.6  | B S302A   | -0.18            |
| 663 | 1A22 | 2.6  | B I303A   | 0.43             |
| 664 | 1A22 | 2.6  | B I305A   | 0.13             |
| 665 | 1A22 | 2.6  | B P306A   | 2.63             |
| 666 | 1A22 | 2.6  | B V325A   | 1.14             |
| 667 | 1A22 | 2.6  | B I328A   | 0.59             |
| 668 | 1A22 | 2.6  | B V329A   | -0.05            |
| 669 | 1A22 | 2.6  | B Q330A   | -0.03            |
| 670 | 1GC1 | 2.5  | C K1A     | 0.06             |
| 671 | 1GC1 | 2.5  | C K2A     | -0.02            |
| 672 | 1GC1 | 2.5  | C K7A     | 1.00             |
| 673 | 1GC1 | 2.5  | C K8A     | 0.11             |
| 674 | 1GC1 | 2.5  | C D10A    | 0.00             |

**Dataset S1: Curated ZEMu dataset with experimental  $\Delta\Delta G$  values**

| ID  | PDB  | Res. | Mutations | $\Delta\Delta G$ |
|-----|------|------|-----------|------------------|
| 675 | 1GC1 | 2.5  | C T11A    | 0.00             |
| 676 | 1GC1 | 2.5  | C T15A    | 0.32             |
| 677 | 1GC1 | 2.5  | C T17A    | -0.13            |
| 678 | 1GC1 | 2.5  | C S19A    | 0.00             |
| 679 | 1GC1 | 2.5  | C Q20A    | -0.02            |
| 680 | 1GC1 | 2.5  | C K21A    | -0.13            |
| 681 | 1GC1 | 2.5  | C K22A    | 0.24             |
| 682 | 1GC1 | 2.5  | C S23A    | 0.29             |
| 683 | 1GC1 | 2.5  | C Q25A    | 0.03             |
| 684 | 1GC1 | 2.5  | C H27A    | 0.28             |
| 685 | 1GC1 | 2.5  | C K29A    | 0.54             |
| 686 | 1GC1 | 2.5  | C N30A    | 0.17             |
| 687 | 1GC1 | 2.5  | C S31A    | 0.11             |
| 688 | 1GC1 | 2.5  | C N32A    | 0.18             |
| 689 | 1GC1 | 2.5  | C Q33A    | 0.11             |
| 690 | 1GC1 | 2.5  | C K35A    | 0.32             |
| 691 | 1GC1 | 2.5  | C N39A    | 0.47             |
| 692 | 1GC1 | 2.5  | C Q40A    | -0.41            |
| 693 | 1GC1 | 2.5  | C S42A    | 0.00             |
| 694 | 1GC1 | 2.5  | C L44A    | 1.06             |
| 695 | 1GC1 | 2.5  | C T45A    | -0.15            |
| 696 | 1GC1 | 2.5  | C K46A    | 1.43             |
| 697 | 1GC1 | 2.5  | C S49A    | 0.61             |
| 698 | 1GC1 | 2.5  | C K50A    | 0.05             |
| 699 | 1GC1 | 2.5  | C L51A    | 1.23             |
| 700 | 1GC1 | 2.5  | C N52A    | 0.71             |

**Dataset S1: Curated ZEMu dataset with experimental  $\Delta\Delta G$  values**

| ID  | PDB  | Res. | Mutations            | $\Delta\Delta G$ |
|-----|------|------|----------------------|------------------|
| 701 | 1GC1 | 2.5  | C D53A               | 0.30             |
| 702 | 1GC1 | 2.5  | C D56A               | -0.07            |
| 703 | 1GC1 | 2.5  | C R58A               | 0.13             |
| 704 | 1GC1 | 2.5  | C R59A               | 1.18             |
| 705 | 1GC1 | 2.5  | C S60A               | -0.09            |
| 706 | 1GC1 | 2.5  | C D63A               | -0.32            |
| 707 | 1GC1 | 2.5  | C Q64A               | 0.44             |
| 708 | 1GC1 | 2.5  | C N66A               | -0.03            |
| 709 | 1GC1 | 2.5  | C K72A               | -0.02            |
| 710 | 1GC1 | 2.5  | C N73A               | -0.11            |
| 711 | 1GC1 | 2.5  | C K75A               | 0.16             |
| 712 | 1GC1 | 2.5  | C E77A               | 0.56             |
| 713 | 1GC1 | 2.5  | C Y82A               | 1.29             |
| 714 | 1GC1 | 2.5  | C E85A               | 1.32             |
| 715 | 1GC1 | 2.5  | C V86A               | -0.07            |
| 716 | 1GC1 | 2.5  | C E87A               | 0.22             |
| 717 | 1GC1 | 2.5  | C D88A               | -0.07            |
| 718 | 1GC1 | 2.5  | C Q89A               | 0.17             |
| 719 | 1GC1 | 2.5  | C K90A               | 0.05             |
| 720 | 1GC1 | 2.5  | C E91A               | -0.13            |
| 721 | 1GC1 | 2.5  | C E92A               | 0.02             |
| 722 | 1GC1 | 2.5  | C Q94A               | -0.11            |
| 723 | 1GC1 | 2.5  | C Q89L               | -0.31            |
| 724 | 1GC1 | 2.5  | C Q40A;C D63A        | -0.50            |
| 725 | 1GC1 | 2.5  | C Q89L;C Q40A;C D63A | -0.85            |
| 726 | 1A22 | 2.6  | A T3A                | -0.05            |

**Dataset S1: Curated ZEMu dataset with experimental  $\Delta\Delta G$  values**

| ID  | PDB  | Res. | Mutations | $\Delta\Delta G$ |
|-----|------|------|-----------|------------------|
| 727 | 1A22 | 2.6  | A I4A     | 0.41             |
| 728 | 1A22 | 2.6  | A P5A     | 0.43             |
| 729 | 1A22 | 2.6  | A L6A     | 0.60             |
| 730 | 1A22 | 2.6  | A S7A     | 0.34             |
| 731 | 1A22 | 2.6  | A R8A     | 0.20             |
| 732 | 1A22 | 2.6  | A L9A     | -0.04            |
| 733 | 1A22 | 2.6  | A F10A    | 1.04             |
| 734 | 1A22 | 2.6  | A N12A    | 0.10             |
| 735 | 1A22 | 2.6  | A L15A    | 0.15             |
| 736 | 1A22 | 2.6  | A R16A    | 0.24             |
| 737 | 1A22 | 2.6  | A R19A    | 0.05             |
| 738 | 1A22 | 2.6  | A F54A    | 0.87             |
| 739 | 1A22 | 2.6  | A S55A    | 0.11             |
| 740 | 1A22 | 2.6  | A S57A    | 0.20             |
| 741 | 1A22 | 2.6  | A I58A    | 1.64             |
| 742 | 1A22 | 2.6  | A P59A    | 0.38             |
| 743 | 1A22 | 2.6  | A E66A    | 0.43             |
| 744 | 1A22 | 2.6  | A Q69A    | -0.05            |
| 745 | 1A22 | 2.6  | A K70A    | 0.52             |
| 746 | 1A22 | 2.6  | A S71A    | 0.41             |
| 747 | 1A22 | 2.6  | A L73A    | -0.20            |
| 748 | 1A22 | 2.6  | A V180A   | 0.00             |
| 749 | 1A22 | 2.6  | A Q181A   | 0.27             |
| 750 | 1A22 | 2.6  | A C182A   | 1.01             |
| 751 | 1A22 | 2.6  | A S184A   | -0.05            |
| 752 | 1A22 | 2.6  | A V185A   | 0.87             |

**Dataset S1: Curated ZEMu dataset with experimental  $\Delta\Delta G$  values**

| ID  | PDB  | Res. | Mutations | $\Delta\Delta G$ |
|-----|------|------|-----------|------------------|
| 753 | 1A22 | 2.6  | A G187A   | 0.34             |
| 754 | 1A22 | 2.6  | A S188A   | -0.20            |
| 755 | 1A22 | 2.6  | A F191A   | 0.19             |
| 756 | 1A4Y | 2    | B H13A    | -0.34            |
| 757 | 1A4Y | 2    | B H114A   | 0.62             |
| 758 | 1A4Y | 2    | B K40Q    | 4.25             |
| 759 | 1A22 | 2.6  | A M14A    | 0.10             |
| 760 | 1A22 | 2.6  | A H18A    | -0.50            |
| 761 | 1A22 | 2.6  | A H21A    | 0.20             |
| 762 | 1A22 | 2.6  | A Q22A    | -0.20            |
| 763 | 1A22 | 2.6  | A F25A    | -0.41            |
| 764 | 1A22 | 2.6  | A D26A    | -0.20            |
| 765 | 1A22 | 2.6  | A Q29A    | -0.60            |
| 766 | 1A22 | 2.6  | A Y42A    | 0.20             |
| 767 | 1A22 | 2.6  | A L45A    | 1.20             |
| 768 | 1A22 | 2.6  | A Q46A    | 0.10             |
| 769 | 1A22 | 2.6  | A P48A    | 0.40             |
| 770 | 1A22 | 2.6  | A S51A    | 0.30             |
| 771 | 1A22 | 2.6  | A E56A    | 0.40             |
| 772 | 1A22 | 2.6  | A P61A    | 1.20             |
| 773 | 1A22 | 2.6  | A S62A    | 0.10             |
| 774 | 1A22 | 2.6  | A N63A    | 0.30             |
| 775 | 1A22 | 2.6  | A R64A    | 1.60             |
| 776 | 1A22 | 2.6  | A E65A    | -0.50            |
| 777 | 1A22 | 2.6  | A Q68A    | 0.60             |
| 778 | 1A22 | 2.6  | A Y164A   | 0.30             |

**Dataset S1: Curated ZEMu dataset with experimental  $\Delta\Delta G$  values**

| ID  | PDB  | Res. | Mutations | $\Delta\Delta G$ |
|-----|------|------|-----------|------------------|
| 779 | 1A22 | 2.6  | A R167A   | 0.30             |
| 780 | 1A22 | 2.6  | A K168A   | -0.20            |
| 781 | 1A22 | 2.6  | A D171A   | 0.80             |
| 782 | 1A22 | 2.6  | A K172A   | 2.00             |
| 783 | 1A22 | 2.6  | A E174A   | -0.90            |
| 784 | 1A22 | 2.6  | A T175A   | 2.00             |
| 785 | 1A22 | 2.6  | A F176A   | 1.90             |
| 786 | 1A22 | 2.6  | A R178A   | 2.40             |
| 787 | 1A22 | 2.6  | A I179A   | 0.80             |
| 788 | 1A22 | 2.6  | A R183A   | 0.50             |
| 789 | 1A22 | 2.6  | A E186A   | 0.00             |
| 790 | 1A22 | 2.6  | B C308A   | 0.00             |
| 791 | 1A22 | 2.6  | B E320A   | -0.18            |
| 792 | 1A22 | 2.6  | B K321A   | 0.08             |
| 793 | 1A22 | 2.6  | B C322A   | 0.00             |
| 794 | 1A22 | 2.6  | B S324A   | 0.20             |
| 795 | 1A22 | 2.6  | B D364A   | 1.48             |
| 796 | 1A22 | 2.6  | B I365A   | 2.13             |
| 797 | 1A22 | 2.6  | B Q366A   | 0.02             |
| 798 | 1A22 | 2.6  | B K367A   | 0.00             |
| 799 | 1A22 | 2.6  | B V371A   | -0.62            |
| 800 | 1A22 | 2.6  | B T394A   | 0.20             |
| 801 | 1A22 | 2.6  | B T395A   | -0.10            |
| 802 | 1A22 | 2.6  | B Q416A   | 0.89             |
| 803 | 1A22 | 2.6  | B N418A   | 0.30             |
| 804 | 1DAN | 2    | U E208A   | 0.00             |



**Dataset S1: Curated ZEMu dataset with experimental  $\Delta\Delta G$  values**

| ID  | PDB  | Res. | Mutations       | $\Delta\Delta G$ |
|-----|------|------|-----------------|------------------|
| 805 | 1DAN | 2    | U V207A         | 1.57             |
| 806 | 1DAN | 2    | U T203A         | 0.14             |
| 807 | 1DAN | 2    | U K201A;U D204A | 0.04             |
| 808 | 1DAN | 2    | U R200A;U N199A | 0.40             |
| 809 | 1DAN | 2    | U T197A;U V198A | -0.16            |
| 810 | 1DAN | 2    | U S195A         | 0.00             |
| 811 | 1DAN | 2    | U R196A;U S195A | 0.64             |
| 812 | 1DAN | 2    | U Y185A         | -0.32            |
| 813 | 1DAN | 2    | U E183A;U N184A | -0.09            |
| 814 | 1DAN | 2    | U K181A         | 0.02             |
| 815 | 1DAN | 2    | U L176A         | 0.08             |
| 816 | 1DAN | 2    | U N173A;U E174A | -0.02            |
| 817 | 1DAN | 2    | U T172A         | -0.02            |
| 818 | 1DAN | 2    | U K169A         | 0.12             |
| 819 | 1DAN | 2    | U T167A         | 0.21             |
| 820 | 1DAN | 2    | U K166A;U K165A | -0.23            |
| 821 | 1DAN | 2    | U G164R         | -0.16            |
| 822 | 1DAN | 2    | U S163A         | 0.02             |
| 823 | 1DAN | 2    | U W158F         | 0.12             |
| 824 | 1DAN | 2    | U Y156L         | 0.16             |
| 825 | 1DAN | 2    | U I152A         | 0.18             |
| 826 | 1DAN | 2    | U K149A;U D150A | -0.10            |
| 827 | 1DAN | 2    | U D145A         | -0.01            |
| 828 | 1DAN | 2    | U R144A         | 0.00             |
| 829 | 1DAN | 2    | U F140A         | 1.29             |
| 830 | 1DAN | 2    | U T139A         | -0.01            |

**Dataset S1: Curated ZEMu dataset with experimental  $\Delta\Delta G$  values**

| ID  | PDB  | Res. | Mutations               | $\Delta\Delta G$ |
|-----|------|------|-------------------------|------------------|
| 831 | 1DAN | 2    | U R136A;U N138A;U N137A | 0.21             |
| 832 | 1DAN | 2    | U R135A                 | 0.52             |
| 833 | 1DAN | 2    | U L133A                 | -0.02            |
| 834 | 1DAN | 2    | U R131F;U E130A         | -0.02            |
| 835 | 1DAN | 2    | U D129A                 | -0.02            |
| 836 | 1DAN | 2    | U E128A                 | 0.09             |
| 837 | 1DAN | 2    | U K122A                 | -0.12            |
| 838 | 1DAN | 2    | U Q114A;U E117A         | 0.03             |
| 839 | 1DAN | 2    | U N107A;U Q110A         | 0.41             |
| 840 | 1DAN | 2    | U L104A;U E105A         | -0.46            |
| 841 | 1DAN | 2    | U E99A                  | -0.18            |
| 842 | 1DAN | 2    | U Y94A                  | 1.03             |
| 843 | 1DAN | 2    | T K68A                  | -0.07            |
| 844 | 1DAN | 2    | T Q69A;T K68A           | -0.21            |
| 845 | 1DAN | 2    | T K65A;T D66A           | -0.50            |
| 846 | 1DAN | 2    | T D61A;T E62A           | 0.31             |
| 847 | 1DAN | 2    | T D58E                  | 1.38             |
| 848 | 1DAN | 2    | T D58A                  | 2.00             |
| 849 | 1DAN | 2    | T E56A;T D54A           | 0.44             |
| 850 | 1DAN | 2    | T T52A                  | 0.40             |
| 851 | 1DAN | 2    | T F50A                  | 0.44             |
| 852 | 1DAN | 2    | T K48A                  | 0.42             |
| 853 | 1DAN | 2    | T S47A                  | -0.13            |
| 854 | 1DAN | 2    | T K46A                  | 0.24             |
| 855 | 1DAN | 2    | T K48A;T K46A           | 1.17             |
| 856 | 1DAN | 2    | T W45F                  | 1.28             |

**Dataset S1: Curated ZEMu dataset with experimental  $\Delta\Delta G$  values**

| ID  | PDB  | Res. | Mutations     | $\Delta\Delta G$ |
|-----|------|------|---------------|------------------|
| 857 | 1DAN | 2    | T D44A        | 2.39             |
| 858 | 1DAN | 2    | T S42A        | -0.07            |
| 859 | 1DAN | 2    | T K41A        | 0.33             |
| 860 | 1DAN | 2    | T D44A;T K41A | 1.57             |
| 861 | 1DAN | 2    | T Q37A        | 0.76             |
| 862 | 1DAN | 2    | T K28A        | 0.12             |
| 863 | 1DAN | 2    | T E26A        | 0.11             |
| 864 | 1DAN | 2    | T W25F        | 0.62             |
| 865 | 1DAN | 2    | T E24A        | 0.66             |
| 866 | 1DAN | 2    | T I22A        | 0.65             |
| 867 | 1DAN | 2    | T T21A        | -0.16            |
| 868 | 1DAN | 2    | T K20R        | 1.69             |
| 869 | 1DAN | 2    | T K20A        | 2.44             |
| 870 | 1DAN | 2    | T N18A        | 0.18             |
| 871 | 1DAN | 2    | T T17A        | 0.12             |
| 872 | 1DAN | 2    | T K15A        | -0.39            |
| 873 | 1DAN | 2    | T W14F        | 0.69             |
| 874 | 1FC2 | 2.8  | C Y133W       | 0.41             |
| 875 | 1FC2 | 2.8  | C I135W       | 3.14             |
| 876 | 1FC2 | 2.8  | C F149W       | 0.00             |
| 877 | 1FC2 | 2.8  | C L163W       | 0.00             |
| 878 | 1DAN | 2    | T S47G;T W45R | 1.54             |
| 879 | 1DAN | 2    | T W45A        | 1.56             |
| 880 | 1DAN | 2    | T V33A        | -0.19            |
| 881 | 1DAN | 2    | T Y51A        | -0.13            |
| 882 | 1DAN | 2    | T F76A        | 1.15             |

**Dataset S1: Curated ZEMu dataset with experimental  $\Delta\Delta G$  values**

| ID  | PDB  | Res. | Mutations             | $\Delta\Delta G$ |
|-----|------|------|-----------------------|------------------|
| 883 | 1DAN | 2    | T Y78A                | 0.65             |
| 884 | 1DAN | 2    | U P92A                | -0.19            |
| 885 | 1DAN | 2    | T V36A                | -0.13            |
| 886 | 1DAN | 2    | T I38A                | -0.13            |
| 887 | 1DAN | 2    | T G43A                | 0.07             |
| 888 | 1DAN | 2    | T C57S;T C49S         | -0.34            |
| 889 | 1DAN | 2    | T T60A                | 2.31             |
| 890 | 1DAN | 2    | U F140A;T T60A        | 4.50             |
| 891 | 1DAN | 2    | T K20A;T T60A         | 3.18             |
| 892 | 1DAN | 2    | T W45A;T D44A         | 1.57             |
| 893 | 1DAN | 2    | U F140A;T D44A        | 3.30             |
| 894 | 1DAN | 2    | T D44A;T K20A         | 4.16             |
| 895 | 1DAN | 2    | T D58A;T D44A         | 4.01             |
| 896 | 1DAN | 2    | T T60A;T D44A         | 4.32             |
| 897 | 1DAN | 2    | T D44A;U F140A;T K20A | 5.96             |
| 898 | 1TM1 | 1.7  | I T58D                | 2.10             |
| 899 | 1TM1 | 1.7  | I E60A;I T58A         | 3.39             |
| 900 | 1TM1 | 1.7  | I T58D;I E60A         | 0.75             |
| 901 | 1TM1 | 1.7  | I V70A                | 0.02             |
| 902 | 1DAN | 2    | U Q110A               | 1.30             |
| 903 | 1DAN | 2    | T S16A                | -0.13            |
| 904 | 1DAN | 2    | T L59A                | 0.00             |
| 905 | 1DAN | 2    | T D61A                | 0.24             |
| 906 | 1DAN | 2    | T E62A                | 0.00             |
| 907 | 1DAN | 2    | T I63A                | 0.00             |
| 908 | 1DAN | 2    | T V64A                | 0.00             |

**Dataset S1: Curated ZEMu dataset with experimental  $\Delta\Delta G$  values**

| ID  | PDB  | Res. | Mutations | $\Delta\Delta G$ |
|-----|------|------|-----------|------------------|
| 909 | 1DAN | 2    | T Q69A    | 0.00             |
| 910 | 1DAN | 2    | T L72A    | -0.06            |
| 911 | 1DAN | 2    | U E105A   | -0.06            |
| 912 | 1DAN | 2    | U T106A   | -0.06            |
| 913 | 1DAN | 2    | U N107A   | 0.00             |
| 914 | 1DAN | 2    | U R131A   | 0.00             |
| 915 | 1DAN | 2    | U T132A   | 0.00             |
| 916 | 1DAN | 2    | U R136A   | -0.06            |
| 917 | 1DAN | 2    | U N138A   | 0.00             |
| 918 | 1DAN | 2    | U V146A   | 0.20             |
| 919 | 1DAN | 2    | U F147A   | -0.06            |
| 920 | 1DAN | 2    | U Y157A   | 0.00             |
| 921 | 1DAN | 2    | U V179A   | 0.11             |
| 922 | 1DAN | 2    | U R196A   | 0.46             |
| 923 | 1DAN | 2    | U T197A   | 0.11             |
| 924 | 1DAN | 2    | U V198A   | 0.11             |
| 925 | 1DAN | 2    | U N199A   | 0.00             |
| 926 | 1FC2 | 2.8  | C L136D   | 0.82             |
| 927 | 1FC2 | 2.8  | C N147A   | 0.58             |
| 928 | 1FC2 | 2.8  | C F149A   | 0.06             |
| 929 | 1FC2 | 2.8  | C I150A   | 2.18             |
| 930 | 1FC2 | 2.8  | C K154A   | 1.23             |
| 931 | 1DVF | 1.9  | A H30A    | 1.65             |
| 932 | 1DVF | 1.9  | A Y32A    | 2.03             |
| 933 | 1DVF | 1.9  | A Y49A    | 1.73             |
| 934 | 1DVF | 1.9  | A Y50A    | 0.69             |

**Dataset S1: Curated ZEMu dataset with experimental  $\Delta\Delta G$  values**

| ID  | PDB  | Res. | Mutations     | $\Delta\Delta G$ |
|-----|------|------|---------------|------------------|
| 935 | 1DVF | 1.9  | A W92A        | 0.34             |
| 936 | 1DVF | 1.9  | A S93A        | 1.16             |
| 937 | 1DVF | 1.9  | B T30A        | 0.91             |
| 938 | 1DVF | 1.9  | B Y32A        | 1.83             |
| 939 | 1DVF | 1.9  | B W52A        | 4.13             |
| 940 | 1DVF | 1.9  | B D54A        | 4.28             |
| 941 | 1DVF | 1.9  | B N56A        | 1.16             |
| 942 | 1DVF | 1.9  | B D58A        | 1.60             |
| 943 | 1DVF | 1.9  | B E98A        | 4.19             |
| 944 | 1DVF | 1.9  | B R99A        | 1.87             |
| 945 | 1DVF | 1.9  | B D100A       | 2.79             |
| 946 | 1DVF | 1.9  | B Y101F       | 2.01             |
| 947 | 1VFB | 1.8  | A H30A        | 0.84             |
| 948 | 1VFB | 1.8  | A Y32A        | 1.72             |
| 949 | 1VFB | 1.8  | A Y49A        | 0.80             |
| 950 | 1VFB | 1.8  | A Y50A        | 0.52             |
| 951 | 1VFB | 1.8  | A W92A        | 2.73             |
| 952 | 1VFB | 1.8  | A S93A        | 0.34             |
| 953 | 1VFB | 1.8  | B T30A        | -0.06            |
| 954 | 1VFB | 1.8  | B Y32A;B Y32A | 0.65             |
| 955 | 1VFB | 1.8  | B W52A        | 0.92             |
| 956 | 1VFB | 1.8  | B D54A        | 0.64             |
| 957 | 1VFB | 1.8  | B N56A        | 0.18             |
| 958 | 1VFB | 1.8  | B D58A        | -0.21            |
| 959 | 1VFB | 1.8  | B E98A        | 1.16             |
| 960 | 1VFB | 1.8  | B R99A        | -0.10            |

**Dataset S1: Curated ZEMu dataset with experimental  $\Delta\Delta G$  values**

| ID  | PDB  | Res. | Mutations            | $\Delta\Delta G$ |
|-----|------|------|----------------------|------------------|
| 961 | 1VFB | 1.8  | B D100A              | 3.07             |
| 962 | 1VFB | 1.8  | B Y101F;B Y101F      | 1.75             |
| 963 | 1A22 | 2.6  | A F25A;A Y42A;A Q46A | 0.20             |
| 964 | 1A22 | 2.6  | A Q46A;A Y42A        | 0.29             |
| 965 | 1CBW | 2.6  | I T11A               | 0.22             |
| 966 | 1CBW | 2.6  | I G12A               | 0.68             |
| 967 | 1CBW | 2.6  | I P13A               | -0.06            |
| 968 | 1CBW | 2.6  | I R17A               | 0.55             |
| 969 | 1CBW | 2.6  | I I18A               | 1.40             |
| 970 | 1CBW | 2.6  | I I19A               | 0.14             |
| 971 | 1CBW | 2.6  | I R20A               | 0.35             |
| 972 | 1CBW | 2.6  | I F33A               | 0.14             |
| 973 | 1CBW | 2.6  | I V34A               | 0.05             |
| 974 | 1CBW | 2.6  | I Y35A               | 0.88             |
| 975 | 1CBW | 2.6  | I G36A               | 0.95             |
| 976 | 1CBW | 2.6  | I G37A               | 0.81             |
| 977 | 1CBW | 2.6  | I R39A               | 0.22             |
| 978 | 1CBW | 2.6  | I K46A               | 0.14             |
| 979 | 1VFB | 1.8  | A Y50S               | 1.42             |
| 980 | 1DAN | 2    | H R134A              | 0.75             |
| 981 | 1DAN | 2    | H M164A              | 0.74             |
| 982 | 1DAN | 2    | H K192A              | -0.19            |
| 983 | 1DAN | 2    | H L144A              | 0.03             |
| 984 | 1DVF | 1.9  | D Y98A               | 4.74             |
| 985 | 1DVF | 1.9  | C Y49A               | 1.86             |
| 986 | 1DVF | 1.9  | D Q100A              | 1.63             |

**Dataset S1: Curated ZEMu dataset with experimental  $\Delta\Delta G$  values**

| ID   | PDB  | Res. | Mutations       | $\Delta\Delta G$ |
|------|------|------|-----------------|------------------|
| 987  | 1DVF | 1.9  | D N54A          | 1.86             |
| 988  | 1DVF | 1.9  | D R100bA        | 4.09             |
| 989  | 1DVF | 1.9  | D K30A          | 1.00             |
| 990  | 1DVF | 1.9  | D H33A          | 1.86             |
| 991  | 1DVF | 1.9  | D D52A          | 1.68             |
| 992  | 1DVF | 1.9  | D I97A          | 2.68             |
| 993  | 1DVF | 1.9  | B E98A;D Y98A   | 4.63             |
| 994  | 1DVF | 1.9  | C Y49A;B D54A   | 4.49             |
| 995  | 1DVF | 1.9  | D Q100A;B D58A  | 1.46             |
| 996  | 1DVF | 1.9  | A Y49A;D N54A   | 2.03             |
| 997  | 1DVF | 1.9  | A Y32A;D R100bA | 4.65             |
| 998  | 1DVF | 1.9  | D Q100A;B N56A  | 1.49             |
| 999  | 1DVF | 1.9  | D Q100A;B W52A  | 4.16             |
| 1000 | 1DVF | 1.9  | B D100A;D H33A  | 4.15             |
| 1001 | 1DVF | 1.9  | D D52A;B D100A  | 4.32             |
| 1002 | 1DVF | 1.9  | D H33A;A Y49A   | 2.63             |
| 1003 | 1DVF | 1.9  | B D100A;D N54A  | 4.09             |
| 1004 | 1DVF | 1.9  | D N54A;B N56A   | 2.30             |
| 1005 | 1DVF | 1.9  | D H33A;B N56A   | 2.53             |
| 1006 | 1CSE | 1.2  | I L45G          | 2.25             |
| 1007 | 1CSE | 1.2  | I L45S          | 1.17             |
| 1008 | 1CSE | 1.2  | I L45P          | 6.67             |
| 1009 | 1CSE | 1.2  | I L45I          | 2.94             |
| 1010 | 1CSE | 1.2  | I L45D          | 4.35             |
| 1011 | 1CSE | 1.2  | I L45E          | 2.35             |
| 1012 | 1ACB | 2    | I L45G          | 6.03             |



**Dataset S1: Curated ZEMu dataset with experimental  $\Delta\Delta G$  values**

| ID   | PDB  | Res. | Mutations | $\Delta\Delta G$ |
|------|------|------|-----------|------------------|
| 1013 | 1ACB | 2    | I L45S    | 4.95             |
| 1014 | 1ACB | 2    | I L45P    | 6.85             |
| 1015 | 1ACB | 2    | I L45I    | 4.23             |
| 1016 | 1ACB | 2    | I L45D    | 6.77             |
| 1017 | 1ACB | 2    | I L45E    | 6.55             |
| 1018 | 1IAR | 2.3  | A I5A     | 1.17             |
| 1019 | 1IAR | 2.3  | A I5R     | 0.80             |
| 1020 | 1IAR | 2.3  | A T6A     | -0.10            |
| 1021 | 1IAR | 2.3  | A T6D     | 1.39             |
| 1022 | 1IAR | 2.3  | A Q8A     | -0.02            |
| 1023 | 1IAR | 2.3  | A Q8R     | 0.04             |
| 1024 | 1IAR | 2.3  | A E9Q     | 3.11             |
| 1025 | 1IAR | 2.3  | A I11A    | 0.07             |
| 1026 | 1IAR | 2.3  | A K12S    | -0.01            |
| 1027 | 1IAR | 2.3  | A K12E    | 0.14             |
| 1028 | 1IAR | 2.3  | A T13A    | 0.98             |
| 1029 | 1IAR | 2.3  | A T13D    | -0.22            |
| 1030 | 1IAR | 2.3  | A N15A    | -0.03            |
| 1031 | 1IAR | 2.3  | A N15D    | -0.08            |
| 1032 | 1IAR | 2.3  | A S16A    | -0.18            |
| 1033 | 1IAR | 2.3  | A S16D    | -0.10            |
| 1034 | 1IAR | 2.3  | A E19A    | -0.32            |
| 1035 | 1IAR | 2.3  | A E19R    | -0.12            |
| 1036 | 1IAR | 2.3  | A R53Q    | 0.84             |
| 1037 | 1IAR | 2.3  | A K77A    | 0.15             |
| 1038 | 1IAR | 2.3  | A K77E    | 0.61             |

**Dataset S1: Curated ZEMu dataset with experimental  $\Delta\Delta G$  values**

| ID   | PDB  | Res. | Mutations | $\Delta\Delta G$ |
|------|------|------|-----------|------------------|
| 1039 | 1IAR | 2.3  | A Q78A    | 0.13             |
| 1040 | 1IAR | 2.3  | A Q78E    | 0.25             |
| 1041 | 1IAR | 2.3  | A R81A    | 0.48             |
| 1042 | 1IAR | 2.3  | A R81E    | 1.46             |
| 1043 | 1IAR | 2.3  | A F82A    | -0.09            |
| 1044 | 1IAR | 2.3  | A F82D    | -0.58            |
| 1045 | 1IAR | 2.3  | A K84A    | 0.35             |
| 1046 | 1IAR | 2.3  | A K84D    | 1.88             |
| 1047 | 1IAR | 2.3  | A R85A    | 0.43             |
| 1048 | 1IAR | 2.3  | A R85E    | 1.22             |
| 1049 | 1IAR | 2.3  | A R88Q    | 2.83             |
| 1050 | 1IAR | 2.3  | A R88A    | 3.75             |
| 1051 | 1IAR | 2.3  | A N89A    | 1.56             |
| 1052 | 1IAR | 2.3  | A W91A    | 0.73             |
| 1053 | 1IAR | 2.3  | A W91D    | 1.31             |
| 1054 | 1A4Y | 2    | B H8A     | 0.90             |
| 1055 | 1A4Y | 2    | B Q12A    | 0.30             |
| 1056 | 1A4Y | 2    | B N68A    | 0.12             |
| 1057 | 1A4Y | 2    | B E108A   | -0.32            |
| 1058 | 1A4Y | 2    | A Y434A   | 3.26             |
| 1059 | 1A4Y | 2    | A D435A   | 3.48             |
| 1060 | 1A4Y | 2    | A Y437A   | 0.82             |
| 1061 | 1DFJ | 2.5  | I Y430A   | 5.95             |
| 1062 | 1DFJ | 2.5  | I D431A   | 3.66             |
| 1063 | 1DFJ | 2.5  | I Y433A   | 2.62             |
| 1064 | 2PCB | 2.8  | A E291Q   | 0.02             |

**Dataset S1: Curated ZEMu dataset with experimental  $\Delta\Delta G$  values**

| ID   | PDB    | Res. | Mutations | $\Delta\Delta G$ |
|------|--------|------|-----------|------------------|
| 1065 | 2PCB   | 2.8  | A E32Q    | 0.54             |
| 1066 | 2PCB   | 2.8  | A E35Q    | 0.69             |
| 1067 | 2PCB   | 2.8  | A A193F   | 0.79             |
| 1068 | 2PCB   | 2.8  | A D34N    | 0.90             |
| 1069 | 2PCB   | 2.8  | A E290N   | 0.91             |
| 1070 | 1AK4   | 2.36 | D P485A   | 0.91             |
| 1071 | 1AK4   | 2.36 | D V486A   | 0.82             |
| 1072 | 1AK4   | 2.36 | D H487A   | 0.84             |
| 1073 | 1AK4   | 2.36 | D H487Q   | 0.80             |
| 1074 | 1AK4   | 2.36 | D H487R   | 1.47             |
| 1075 | 1AK4   | 2.36 | D A488V   | 0.60             |
| 1076 | 1AK4   | 2.36 | D A488G   | 2.48             |
| 1077 | 1AK4   | 2.36 | D G489A   | 1.91             |
| 1078 | 1AK4   | 2.36 | D G489V   | 2.86             |
| 1079 | 1AK4   | 2.36 | D P490A   | 2.00             |
| 1080 | 1AK4   | 2.36 | D I491A   | 0.07             |
| 1081 | 1AK4   | 2.36 | D I491V   | -0.17            |
| 1082 | 1AK4   | 2.36 | D A492G   | 0.41             |
| 1083 | 1AK4   | 2.36 | D A492V   | 0.19             |
| 1084 | 1AK4   | 2.36 | D P493A   | 0.51             |
| 1085 | 1E+096 | 2.4  | A N26H    | 1.09             |
| 1086 | 1E+096 | 2.4  | A I33N    | 2.01             |
| 1087 | 1E+096 | 2.4  | A D38N    | 2.16             |
| 1088 | 1E+096 | 2.4  | A M45T    | 0.36             |
| 1089 | 1E+096 | 2.4  | A K132E   | -0.19            |
| 1090 | 1E+096 | 2.4  | A L134R   | -0.13            |

**Dataset S1: Curated ZEMu dataset with experimental  $\Delta\Delta G$  values**

| ID   | PDB  | Res. | Mutations                                                      | $\Delta\Delta G$ |
|------|------|------|----------------------------------------------------------------|------------------|
| 1091 | 1JRH | 2.8  | I T14V                                                         | -0.03            |
| 1092 | 1JRH | 2.8  | I T19L;I E21K                                                  | -0.03            |
| 1093 | 1JRH | 2.8  | I I28V;I M25L                                                  | -0.21            |
| 1094 | 1JRH | 2.8  | I P37S;I V41I;I I35N;I V39T                                    | 0.14             |
| 1095 | 1JRH | 2.8  | I E45Q                                                         | 0.10             |
| 1096 | 1JRH | 2.8  | I I61T;I H65D;I A59S                                           | 0.07             |
| 1097 | 1JRH | 2.8  | I N79V;I G75M;I S78D;I L81A;I D76Y;I S71Y;I H73Q;I D72E;I V74I | 2.96             |
| 1098 | 1JRH | 2.8  | I V83A;I R88K                                                  | -0.21            |
| 1099 | 1JRH | 2.8  | I K98R;I E100K;I A95D                                          | -0.05            |
| 1100 | 1JRH | 2.8  | I V104M;I A103L                                                | 0.63             |
| 1101 | 1EMV | 1.7  | A C23A                                                         | 0.92             |
| 1102 | 1EMV | 1.7  | A N24A                                                         | 0.14             |
| 1103 | 1EMV | 1.7  | A D26A                                                         | 0.34             |
| 1104 | 1EMV | 1.7  | A T27A                                                         | 0.73             |
| 1105 | 1EMV | 1.7  | A S28A                                                         | 0.17             |
| 1106 | 1EMV | 1.7  | A S29A                                                         | 0.96             |
| 1107 | 1EMV | 1.7  | A E30A                                                         | 1.42             |
| 1108 | 1EMV | 1.7  | A E31A                                                         | 0.31             |
| 1109 | 1EMV | 1.7  | A E32A                                                         | 0.22             |
| 1110 | 1EMV | 1.7  | A L33A                                                         | 3.42             |
| 1111 | 1EMV | 1.7  | A V34A                                                         | 2.58             |
| 1112 | 1EMV | 1.7  | A K35A                                                         | 0.19             |
| 1113 | 1EMV | 1.7  | A L36A                                                         | 0.91             |
| 1114 | 1EMV | 1.7  | A V37A                                                         | 1.66             |
| 1115 | 1EMV | 1.7  | A T38A                                                         | 0.90             |

**Dataset S1: Curated ZEMu dataset with experimental  $\Delta\Delta G$  values**

| ID   | PDB  | Res. | Mutations       | $\Delta\Delta G$ |
|------|------|------|-----------------|------------------|
| 1116 | 1EMV | 1.7  | A E41A          | 2.08             |
| 1117 | 1EMV | 1.7  | A E42A          | 0.66             |
| 1118 | 1EMV | 1.7  | A T44A          | 0.30             |
| 1119 | 1EMV | 1.7  | A E45A          | 0.21             |
| 1120 | 1EMV | 1.7  | A H46A          | 0.83             |
| 1121 | 1EMV | 1.7  | A P47A          | 0.44             |
| 1122 | 1EMV | 1.7  | A S48A          | 0.01             |
| 1123 | 1EMV | 1.7  | A G49A          | 1.49             |
| 1124 | 1EMV | 1.7  | A S50A          | 2.19             |
| 1125 | 1EMV | 1.7  | A D51A          | 5.92             |
| 1126 | 1EMV | 1.7  | A L52A          | 0.60             |
| 1127 | 1EMV | 1.7  | A I53A          | 0.85             |
| 1128 | 1EMV | 1.7  | A Y54A          | 4.83             |
| 1129 | 1EMV | 1.7  | A Y55A          | 4.64             |
| 1130 | 1EMV | 1.7  | A P56A          | 1.24             |
| 1131 | 1EMV | 1.7  | A D60A          | 0.51             |
| 1132 | 1EMV | 1.7  | A S63A          | 0.87             |
| 1133 | 1EMV | 1.7  | A V68A          | 1.86             |
| 1134 | 1EMV | 1.7  | A N69A          | 0.28             |
| 1137 | 1AHW | 3    | C D150A;C K149A | 1.18             |
| 1138 | 1AHW | 3    | C Y157A         | -1.89            |
| 1139 | 1AHW | 3    | C K165A;C K166A | -1.33            |
| 1140 | 1AHW | 3    | C T167A         | -0.07            |
| 1141 | 1AHW | 3    | C T170A         | 1.11             |
| 1142 | 1AHW | 3    | C L176A         | 0.99             |
| 1143 | 1AHW | 3    | C D178A         | -0.48            |

**Dataset S1: Curated ZEMu dataset with experimental  $\Delta\Delta G$  values**

| ID   | PDB  | Res. | Mutations | $\Delta\Delta G$ |
|------|------|------|-----------|------------------|
| 1144 | 1AHW | 3    | C T197A   | 1.35             |
| 1145 | 1AHW | 3    | C V198A   | -0.31            |
| 1146 | 1AHW | 3    | C N199A   | 1.08             |
| 1147 | 1JCK | 3.5  | B T20A    | 1.65             |
| 1148 | 1JCK | 3.5  | B Y26A    | 1.77             |
| 1149 | 1JCK | 3.5  | B N60A    | 1.64             |
| 1150 | 1JCK | 3.5  | B Y90A    | 2.59             |
| 1151 | 1JCK | 3.5  | B V91A    | 2.23             |
| 1152 | 1JCK | 3.5  | B K103A   | 0.68             |
| 1153 | 1JCK | 3.5  | B F176A   | 2.13             |
| 1154 | 1A22 | 2.6  | B S419A   | 0.04             |
| 1155 | 1A22 | 2.6  | B R243L   | 0.52             |
| 1156 | 1A22 | 2.6  | B R243M   | 1.00             |
| 1157 | 1NMB | 2.2  | H D56N    | 2.80             |
| 1158 | 1NMB | 2.2  | H D56E    | 2.40             |
| 1159 | 1NMB | 2.2  | H Y99A    | 1.50             |
| 1160 | 1NMB | 2.2  | H Y100aF  | 0.50             |
| 1161 | 1NMB | 2.2  | L Y32F    | 1.70             |
| 1162 | 1NMB | 2.2  | L L94V    | 0.90             |
| 1163 | 1VFB | 1.8  | C D18A    | 0.34             |
| 1164 | 1VFB | 1.8  | C N19A    | 0.40             |
| 1165 | 1VFB | 1.8  | C Y23A    | 0.41             |
| 1166 | 1VFB | 1.8  | C S24A    | 0.85             |
| 1167 | 1VFB | 1.8  | C K116A   | 0.71             |
| 1168 | 1VFB | 1.8  | C T118A   | 0.77             |
| 1169 | 1VFB | 1.8  | C D119A   | 0.95             |

**Dataset S1: Curated ZEMu dataset with experimental  $\Delta\Delta G$  values**

| ID   | PDB  | Res. | Mutations       | $\Delta\Delta G$ |
|------|------|------|-----------------|------------------|
| 1170 | 1VFB | 1.8  | C V120A         | 0.92             |
| 1171 | 1VFB | 1.8  | C Q121A         | 2.88             |
| 1172 | 1VFB | 1.8  | C I124A         | 1.23             |
| 1173 | 1VFB | 1.8  | C R125A         | 1.84             |
| 1174 | 1VFB | 1.8  | C L129A         | 0.17             |
| 1175 | 1VFB | 1.8  | C Q121A;A Y32A  | 1.59             |
| 1176 | 1VFB | 1.8  | A Y32A;C I124A  | 2.91             |
| 1177 | 1VFB | 1.8  | C D18A;A Y50A   | 1.27             |
| 1178 | 1VFB | 1.8  | C D119A;A Y50A  | 1.23             |
| 1179 | 1VFB | 1.8  | A W92A;C Q121A  | 3.52             |
| 1180 | 1VFB | 1.8  | C I124A;A W92A  | 3.85             |
| 1181 | 1VFB | 1.8  | C R125A;A W92A  | 3.39             |
| 1182 | 1VFB | 1.8  | A W92A;C L129A  | 3.31             |
| 1183 | 1VFB | 1.8  | B Y32A;C K116A  | 1.59             |
| 1184 | 1VFB | 1.8  | C D119A;B W52A  | 2.25             |
| 1185 | 1VFB | 1.8  | C T118A;B D54A  | 1.25             |
| 1186 | 1VFB | 1.8  | B D100A;C S24A  | 3.37             |
| 1187 | 1VFB | 1.8  | C D119A;B Y101F | 2.74             |
| 1188 | 1VFB | 1.8  | C V120A;B Y101F | 2.54             |
| 1189 | 1NCA | 2.5  | H N31Q          | 0.00             |
| 1190 | 1NCA | 2.5  | H E96D          | 0.41             |
| 1191 | 1NCA | 2.5  | H D97K          | 0.71             |
| 1192 | 1NCA | 2.5  | H N98Q          | 0.54             |
| 1193 | 2WPT | 1.78 | A D33L          | -3.40            |
| 1194 | 2WPT | 1.78 | A N34V          | -0.90            |
| 1195 | 2WPT | 1.78 | A R38T          | -1.00            |

**Dataset S1: Curated ZEMu dataset with experimental  $\Delta\Delta G$  values**

| ID   | PDB  | Res. | Mutations                   | $\Delta\Delta G$ |
|------|------|------|-----------------------------|------------------|
| 1196 | 2WPT | 1.78 | A E39H                      | 0.00             |
| 1197 | 2WPT | 1.78 | A R42E                      | -0.40            |
| 1198 | 2WPT | 1.78 | A R38T;A N34V               | -2.60            |
| 1199 | 2WPT | 1.78 | A N34V;A D33L;A R38T        | -6.40            |
| 1200 | 2WPT | 1.78 | A R42E;A R38T;A N34V        | -3.20            |
| 1201 | 2WPT | 1.78 | A N34V;A R42E;A E39H;A R38T | -3.00            |
| 1202 | 2WPT | 1.78 | A E30A                      | 1.60             |
| 1203 | 2WPT | 1.78 | A D33A                      | -0.10            |
| 1204 | 2WPT | 1.78 | A N34A                      | -0.40            |
| 1205 | 2WPT | 1.78 | A V37A                      | 3.70             |
| 1206 | 2WPT | 1.78 | A E41A                      | 4.50             |
| 1207 | 2WPT | 1.78 | A R42A                      | -0.30            |
| 1208 | 2WPT | 1.78 | A S50A                      | 2.40             |
| 1209 | 2WPT | 1.78 | A P56A                      | 2.90             |
| 1210 | 1JRH | 2.8  | I K47A                      | 3.85             |
| 1211 | 1JRH | 2.8  | I N48A                      | 0.63             |
| 1212 | 1JRH | 2.8  | I N48Q                      | 0.71             |
| 1213 | 1JRH | 2.8  | I Y49A                      | 3.66             |
| 1214 | 1JRH | 2.8  | I Y49F                      | 1.03             |
| 1215 | 1JRH | 2.8  | I G50A                      | 4.38             |
| 1216 | 1JRH | 2.8  | I V51A                      | 1.48             |
| 1217 | 1JRH | 2.8  | I K52A                      | 3.79             |
| 1218 | 1JRH | 2.8  | I N53A                      | 4.71             |
| 1219 | 1JRH | 2.8  | I S54A                      | 0.46             |
| 1220 | 1JRH | 2.8  | I E55A                      | -0.70            |
| 1221 | 1JRH | 2.8  | I W56F                      | 0.15             |



**Dataset S1: Curated ZEMu dataset with experimental  $\Delta\Delta G$  values**

| ID   | PDB  | Res. | Mutations                   | $\Delta\Delta G$ |
|------|------|------|-----------------------------|------------------|
| 1222 | 1JRH | 2.8  | I W56Y                      | 0.58             |
| 1223 | 1JRH | 2.8  | I N79A                      | 0.00             |
| 1224 | 1JRH | 2.8  | I W82A                      | 4.33             |
| 1225 | 1JRH | 2.8  | I W82F                      | 1.10             |
| 1226 | 1JRH | 2.8  | I W82Y                      | 1.24             |
| 1227 | 1JRH | 2.8  | I R84A                      | 1.03             |
| 1228 | 1JRH | 2.8  | I K98A                      | 0.67             |
| 1229 | 1JTG | 1.73 | A G238S                     | -1.63            |
| 1230 | 1JTG | 1.73 | A E104K                     | 4.23             |
| 1231 | 1JTG | 1.73 | A G238S;B F142A             | 3.68             |
| 1232 | 1JTG | 1.73 | B F142A;A E104K             | 4.55             |
| 1233 | 1MLC | 2.5  | A N32G                      | -0.86            |
| 1234 | 1MLC | 2.5  | A N32Y                      | 0.00             |
| 1235 | 1MLC | 2.5  | B S57V                      | -0.49            |
| 1236 | 1MLC | 2.5  | B S57A                      | -0.37            |
| 1237 | 1MLC | 2.5  | B T58D                      | -0.56            |
| 1238 | 1MLC | 2.5  | A N92A                      | -1.25            |
| 1239 | 1MLC | 2.5  | B T31V                      | 0.53             |
| 1240 | 1MLC | 2.5  | B T31A                      | 0.45             |
| 1241 | 1MLC | 2.5  | B T31W                      | 0.13             |
| 1242 | 1MLC | 2.5  | B T28D                      | -0.15            |
| 1243 | 1MLC | 2.5  | B K65D                      | 0.02             |
| 1244 | 1MLC | 2.5  | B T58D;B S57V               | -0.99            |
| 1245 | 1MLC | 2.5  | A N32G;A N92A               | -0.69            |
| 1246 | 1MLC | 2.5  | A N92A;B T58D;A N32G;B S57V | -1.74            |
| 1247 | 1MLC | 2.5  | A N92A;B T58D;B S57V        | -2.40            |

**Dataset S1: Curated ZEMu dataset with experimental  $\Delta\Delta G$  values**

| ID   | PDB  | Res. | Mutations                   | $\Delta\Delta G$ |
|------|------|------|-----------------------------|------------------|
| 1248 | 1MLC | 2.5  | B T58D;A N92A;B T28D;B S57V | -2.74            |

Listing 1: Flex ddg Rosetta Script implementation

```
1 <ROSETTASCRIPTS>
2   <SCOREFXNS>
3     <ScoreFunction name="fa_talaris2014" weights="talaris2014"/>
4     <ScoreFunction name="fa_talaris2014_cst" weights="talaris2014">
5       <Reweight scoretype="atom_pair_constraint" weight="1.0"/>
6       <Set fa_max_dis="9.0"/>
7     </ScoreFunction>
8   </SCOREFXNS>
9
10  <!-- ### Only required input - mutation resfile ### -->
11  <!-- ##### All residues must be set to be NATAA packable at top of resfile
12  → ### -->
13  <TASKOPERATIONS>
14    <ReadResfile name="res_mutate" filename="%%mutate_resfile_relpath%%"/>
15  </TASKOPERATIONS>
16  <RESIDUE_SELECTORS>
17    <Task name="resselector" fixed="0" packable="0" designable="1"
18  → task_operations="res_mutate"/>
19    <Neighborhood name="bubble" selector="resselector" distance="8.0"/>
20    <PrimarySequenceNeighborhood name="bubble_adjacent" selector="bubble"
21  → lower="1" upper="1"/>
22    <StoredResidueSubset name="restore_neighbor_shell"
23  → subset_name="neighbor_shell"/>
24    <Not name="everythingelse" selector="restore_neighbor_shell"/>
```

```

22 </RESIDUE_SELECTORS>
23 <TASKOPERATIONS>
24 <OperateOnResidueSubset name="repackonly"
↪ selector="restore_neighbor_shell">
25 <RestrictToRepackingRLT/>
26 </OperateOnResidueSubset>
27 <OperateOnResidueSubset name="norepack" selector="everythingelse">
28 <PreventRepackingRLT/>
29 </OperateOnResidueSubset>
30 <UseMultiCoolAnnealer name="multicool" states="6"/>
31 <ExtraChiCutoff name="extrachizero" extrachi_cutoff="0"/>
32 <InitializeFromCommandline name="commandline_init"/>
33 <RestrictToRepacking name="restrict_to_repacking"/>
34 </TASKOPERATIONS>
35
36 <FILTERS>
37 </FILTERS>
38
39 <MOVERS>
40 <StoreResidueSubset name="neighbor_shell_storer"
↪ subset_name="neighbor_shell" residue_selector="bubble_adjacent" />
41
42 <AddConstraintsToCurrentConformationMover name="addcst"
↪ use_distance_cst="1" coord_dev="0.5" min_seq_sep="0" max_distance="9"
↪ CA_only="1" bound_width="0.0" cst_weight="0.0"/>
43 <ClearConstraintsMover name="clearcst"/>

```

```

44     <MinMover name="minimize" scorefxn="fa_talaris2014_cst" chi="1" bb="1"
↳ type="lbfgs_armijo_nonmonotone" tolerance="0.000001" max_iter="5000"
↳ abs_score_convergence_threshold="1.0"/>
45
46     <PackRotamersMover name="repack" scorefxn="fa_talaris2014"
↳ task_operations="commandline_init,repackonly,norepack,multicool"/>
47     <PackRotamersMover name="mutate" scorefxn="fa_talaris2014"
↳ task_operations="commandline_init,res_mutate,norepack,multicool"/>
48
49     <ReportToDB name="dbreport" batch_description="interface_ddG"
↳ database_name="ddG.db3">
50         <ScoreTypeFeatures/>
51         <ScoreFunctionFeatures scorefxn="fa_talaris2014"/>
52         <StructureScoresFeatures scorefxn="fa_talaris2014"/>
53     </ReportToDB>
54
55     <ReportToDB name="structreport" batch_description="interface_ddG_struct"
↳ database_name="struct.db3">
56         <PoseConformationFeatures/>
57         <PdbDataFeatures/>
58         <JobDataFeatures/>
59         <ResidueFeatures/>
60         <PoseCommentsFeatures/>
61         <ProteinResidueConformationFeatures/>
62         <ResidueConformationFeatures/>
63     </ReportToDB>
64

```

```

65     <SavePoseMover name="save_wt_bound_pose" restore_pose="0"
↳ reference_name="wt_bound_pose"/>
66     <SavePoseMover name="save_backrub_pose" restore_pose="0"
↳ reference_name="backrubpdb"/>
67     <SavePoseMover name="restore_backrub_pose" restore_pose="1"
↳ reference_name="backrubpdb"/>
68
69     <InterfaceDdGMover name="int_ddg_mover"
↳ wt_ref_savepose_mover="save_wt_bound_pose" chain_name="%%chainstomove%%"
↳ db_reporter="dbreport" scorefxn="fa_talaris2014"/>
70
71     <ScoreMover name="apply_score" scorefxn="fa_talaris2014_cst"
↳ verbose="0"/>
72
73     <ParsedProtocol name="finish_ddg_post_backrub">
74         <Add mover_name="save_backrub_pose"/>
75         <Add mover_name="structreport"/>
76
77         <Add mover_name="repack"/>
78
79         <Add mover_name="addcst"/>
80         <Add mover_name="minimize"/>
81         <Add mover_name="clearcst"/>
82
83         <Add mover_name="save_wt_bound_pose"/>
84         <Add mover_name="structreport"/>
85         <Add mover_name="restore_backrub_pose"/>

```

```

86
87     <Add mover_name="mutate"/>
88
89     <Add mover_name="addcst"/>
90     <Add mover_name="minimize"/>
91     <Add mover_name="clearcst"/>
92     <Add mover_name="structreport"/>
93
94     <Add mover_name="int_ddG_mover"/>
95 </ParsedProtocol>
96
97 <BackrubProtocol name="backrub" mc_kt="1.2" ntrials="35000"
↪ pivot_residue_selector="restore_neighbor_shell"
↪ task_operations="restrict_to_repacking,commandline_init,extrachizero"
↪ recover_low="0" trajectory_stride="2500"
↪ trajectory_apply_mover="finish_ddg_post_backrub"/>
98
99 </MOVERS>
100 <APPLY_TO_POSE>
101 </APPLY_TO_POSE>
102 <PROTOCOLS>
103     <Add mover_name="addcst"/>
104     <Add mover_name="apply_score"/> <!-- Necessary to initialize neighbor
↪ graph -->
105     <Add mover_name="neighbor_shell_storer"/>
106
107     <Add mover_name="minimize"/>

```

```
108     <Add mover_name="clearcst"/>
109
110     <Add mover_name="backrub"/>
111 </PROTOCOLS>
112 <OUTPUT />
113 </ROSETTASCRIPTS>
```



## References

- (S1) Song, Y.; Tyka, M.; Leaver-Fay, A.; Thompson, J.; Baker, D. Structure-Guided Force-field Optimization. *Proteins: Structure, Function, and Bioinformatics* **2011**, *79*, 1898–1909, DOI: 10.1002/prot.23013.
- (S2) Shapovalov, M. V.; Dunbrack Jr., R. L. A Smoothed Backbone-Dependent Rotamer Library for Proteins Derived From Adaptive Kernel Density Estimates and Regressions. *Structure* **2011**, *19*, 844–858, DOI: 10.1016/j.str.2011.03.019.
- (S3) O’Meara, M. J.; Leaver-Fay, A.; Tyka, M. D.; Stein, A.; Houlihan, K.; DiMaio, F.; Bradley, P.; Kortemme, T.; Baker, D.; Snoeyink, J.; Kuhlman, B. Combined Covalent-Electrostatic Model of Hydrogen Bonding Improves Structure Prediction With Rosetta. *Journal of Chemical Theory and Computation* **2015**, *11*, 609–622, DOI: 10.1021/ct500864r.
- (S4) Alford, R. F.; Leaver-Fay, A.; Jeliaskov, J. R.; O’Meara, M. J.; DiMaio, F. P.; Park, H.; Shapovalov, M. V.; Renfrew, P. D.; Mulligan, V. K.; Kappel, K.; Labonte, J. W.; Pacella, M. S.; Bonneau, R.; Bradley, P.; Dunbrack, R. L.; Das, R.; Baker, D.; Kuhlman, B.; Kortemme, T.; Gray, J. J. The Rosetta All-Atom Energy Function for Macromolecular Modeling and Design. *Journal of Chemical Theory and Computation* **2017**, *13*, 3031–3048, DOI: 10.1021/acs.jctc.7b00125.
- (S5) Kabsch, W.; Sander, C. Dictionary of Protein Secondary Structure: Pattern Recognition of Hydrogen-Bonded and Geometrical Features. *Biopolymers* **1983**, *22*, 2577–2637, DOI: 10.1002/bip.360221211.
- (S6) Joosten, R. P.; te Beek, T. A.; Krieger, E.; Hekkelman, M. L.; Hooft, R. W.; Schneider, R.; Sander, C.; Vriend, G. A Series of PDB Related Databases for Everyday Needs. *Nucleic Acids Research* **2011**, *39*, D411–D419, DOI: 10.1093/nar/gkq1105.
